1 Identification of a Novel Neutralizing and Two Non-Neutralizing Epitopes on Epstein-Barr Virus gp350 Protein

2

3 Lorraine Z Mutsvunguma<sup>a</sup>, Anne Barasa<sup>a,b</sup>, Charles Warden<sup>c</sup>, Joslyn Foley<sup>a</sup>, Murali Muniraju<sup>a</sup>, David H

4 Mulama<sup>a,d</sup>, Peng Ye<sup>a</sup>, Hanjun Qin<sup>c</sup>, Jinhui Wang<sup>c</sup>, Xiwei Wu<sup>c</sup>, Waithaka Mwangi<sup>e</sup>, and Javier Gordon

5 Ogembo<sup>a#</sup>

6

7 <sup>a</sup>Department of Immuno-Oncology, Beckman Research Institute of City of Hope, Duarte, California, USA

8 <sup>b</sup>Department of Human Pathology, University of Nairobi, Nairobi, Kenya

9 <sup>c</sup>Integrative Genomics Core, Beckman Research Institute of City of Hope, Duarte, California, USA

10 <sup>d</sup>Department of Biological Sciences, Masinde Muliro University of Science and Technology, Kakamega, Kenya

11 <sup>e</sup>Department of Diagnostic Medicine/Pathobiology, College of Veterinary Medicine, Kansas State University,

12 Manhattan, Kansas, USA

13

14 Running Head: Novel neutralizing and non-neutralizing gp350 epitopes

15 #Address correspondence to Javier Gordon Ogembo, [jogembo@coh.org](mailto:jogembo@coh.org)

16

17 Abstract word count: 250

18 Text word count:

## 19 Abstract

20 Prevention of Epstein-Barr virus (EBV) primary infection has focused on generating neutralizing antibodies  
21 (nAbs) targeting the major envelope glycoprotein gp350/220 (gp350). To date, eight gp350 epitopes have been  
22 identified, but only one has elicited nAbs. In this study, we generated 23 hybridomas that produced anti-gp350  
23 antibodies. We compared the candidate anti-gp350 antibodies to nAb-72A1 by: (1) testing their ability to detect  
24 gp350 using ELISA, flow cytometry, and immunoblot; (2) sequencing their heavy and light chain  
25 complementarity-determining regions (CDRs); (3) measuring the ability of each monoclonal antibody (mAb) to  
26 neutralize EBV infection *in vitro*; and (4) mapping the gp350 amino acids bound by the mAbs using RepliTope  
27 peptide microarrays. Eight antibodies recognized both denatured and non-denatured gp350, whereas five failed  
28 to react with denatured gp350 but recognized native gp350, suggesting they recognized conformational  
29 epitope(s). Sequence analysis of the heavy and light chain variable regions of the hybridomas identified 15 as  
30 mAbs with novel CDR regions unique from those of nAb-72A1. Seven of the new mAbs neutralized EBV *in*  
31 *vitro*, with HB20 and HB17 reducing EBV infection by 40% and >60%, and >30% and 80%, at 10 µg/ml and  
32 50 µg/ml, respectively. Epitope mapping identified nine epitopes and defined their core residues, including two  
33 unique immunodominant epitopes, <sup>253</sup>TPIPGTGYAYSLRLTPRPVSRFL<sub>275</sub> and  
34 <sup>875</sup>LLLLVMADCAFRRNLSTSHTYTPPY<sub>899</sub>, and a novel nAb epitope <sup>381</sup>GAFASNRTFDIT<sub>392</sub>. This  
35 study provides comprehensive *in vitro* mapping of the exact residues defining nine epitopes of EBV gp350. Our  
36 findings will inform novel strategies to design optimal EBV vaccines capable of conferring broader protection  
37 against the virus.

38

## 39 **Importance**

40 Neutralizing antibodies (nAbs) directed against Epstein-Barr virus envelope glycoprotein gp350/220 (gp350)  
41 are generated in humans upon infection or immunization, and are thought to prevent neonatal infection.  
42 However, clinical use of exogenous nAbs (passive immunization) is limited to a single study using the only  
43 well-characterized nAb, 72A1. The gp350 ectodomain contains at least eight unique B-cell binding epitopes;  
44 two of these epitopes are recognized by nAb-72A1. The exact amino acid residues of the other six epitopes and  
45 their role in generating nAbs has not been elucidated. We used our 15 newly generated and fully characterized  
46 monoclonal antibodies and a peptide-overlapping RepliTope array to provide a comprehensive map of the core  
47 amino acid residues that define epitopes of gp350 and to understand their role in generating nAbs. These results  
48 will inform design of better-targeted gp350 peptide vaccines that contain only protective epitopes, which will  
49 focus the B-cell response to produce predominantly nAbs.

50

51 **Keywords:** EBV, glycoprotein, gp350, antibodies, epitopes, amino acid residues, vaccines

## 52 **Introduction**

53 Epstein-Barr virus (EBV) infection is the causal agent of acute infectious mononucleosis (9, 13). Persistent  
54 EBV infection in immunodeficient individuals is associated with numerous epithelial and lymphoid  
55 malignancies, such as nasopharyngeal carcinoma, gastric carcinoma, Burkitt lymphoma, Hodgkin lymphoma,  
56 and post-transplant lymphoproliferative diseases (PTLD) (24). Pre-existing antibodies provide the primary  
57 defense against viral infection. Prophylactic prevention of EBV primary infection has mainly focused on  
58 blocking the first step of viral entry by generating neutralizing antibodies (nAbs) that target EBV envelope  
59 glycoproteins. Five glycoproteins in particular—gp350/220 (gp350), gp42, gH, gL, and gB—are required for  
60 efficient infection of permissible host cells and have emerged as potential prophylactic targets (2, 3, 5, 20).

61 EBV predominantly infects epithelial cells and B cells, reflecting the viral tropism and the cellular  
62 ontogeny for EBV-associated malignancies (4). There are two schools of thought on how the initial EBV  
63 transmission into the human host cells occurs. In the first infection model, the incoming virus engages with  
64 ephrin receptor A2 via heterodimeric gH/gL, which triggers gB fusion with the epithelial cell membrane and  
65 entry of the virus into the cytoplasm (4). This interaction is thought to occur in the oral mucosa, where the virus  
66 undergoes lytic replication to release virions that subsequently infect B cells. In the alternative model, the  
67 incoming virus binds to the host cell via complement receptor type 1 (CR1)/CD35 (17) and/or CR2/CD21  
68 through its major immunodominant glycoprotein, gp350 (6). The interaction between gp350 and CD35 and/or  
69 CD21 triggers viral adsorption, capping, and endocytosis into the B cell (31), which subsequently leads to the  
70 heterotrimeric viral glycoproteins complex, gp42/gH/gL, binding to HLA class II molecules to activate gB  
71 membrane fusion and entry. Because these two models are not necessarily mutually exclusive, and given that  
72 both gp350 and gH/gL complex are important in initiating the first viral contact with host cells, use of nAbs that  
73 target either gp350 or gH/gL complex, or both, may potentially block incoming virus at the oral mucosa.

74 Nearly all EBV-infected individuals develop nAbs directed to the ectodomains of these glycoproteins (25,  
75 36). These antibodies can prevent neonatal infection, can protect against acute infectious mononucleosis in  
76 adolescents, and can protect against several human lymphoid and epithelial malignancies associated with EBV  
77 infection (7, 14, 23, 28). Although numerous monoclonal antibodies (mAbs) have been generated against EBV  
78 gp350 (11, 21, 34), only two murine mAbs, the non-neutralizing 2L10 and the neutralizing 72A1, have been  
79 extensively characterized and made commercially available (11, 34). Importantly, nAb-72A1 conferred short-  
80 term clinical protection against EBV transmission after transplantation in pediatric patients in a small phase I  
81 clinical trial (8).

82 EBV gp350 is the most immunogenic envelope glycoproteins on the virion. It is a type 1 membrane  
83 protein that encodes for 907 amino acid (aa) residues. A single splice of the primary transcript deletes 197  
84 codons and joins gp350 codons 501 and 699, in frame, to generate the gp220 messenger RNA. Both gp350 and  
85 gp220 are comprised of the same 18-aa residue at the C terminus that is located within the viral membrane, a  
86 25-aa residue at the transmembrane-spanning domain, and a large highly glycosylated N-terminal ectodomain,  
87 aa 1–841 (32). The first 470 aa of gp350 are sufficient for binding CD21 in B cells, as demonstrated by a  
88 truncated gp350 (aa 1–470) blocking the binding of EBV to B cells and reducing viral infectivity (8). The  
89 gp350-binding domain on CD21 maps to N-terminal short consensus repeats (SCRs) 1 and 2, which also bind to  
90 a bioactive fragment of complement protein 3 (C3d) (16, 18). A soluble truncated EBV gp350 fragment (aa 1–  
91 470) and soluble CD21 SCR1 and SCR2 can block EBV infection and immortalization of primary B cells (32).  
92 However, gp350 binding to CD35 is not restricted to N-terminal SCRs; it binds long homologous repeat regions  
93 as well as SCRs 29–30 (22).

94 The gp350 ectodomain is heavily glycosylated, with both N- and O-linked sugars, which accounts for over  
95 half of the molecular mass of the protein. Currently there is only one crystal structure available for gp350,  
96 comprised of a truncated structure between 4–443 aa, with at least 14 glycosylated arginines coating the protein

97 with sugars, with the exception of a single glycan-free patch (30). Mutational studies of several residues in the  
98 glycan-free patch resulted in the loss of CD21 binding (30), suggesting that binding of CD35 and CD21 by  
99 gp350 is mediated within this region.

100 There are at least eight unique CD21 binding epitopes located at the N-terminus of the gp350 ectodomain  
101 (35); at least one of these epitopes (aa 142–161) is capable of eliciting nAbs (32, 35). The aa residues 142–161  
102 are also the binding site for nAb-72A1 (11, 30). Using gp350 synthetic peptides binding to CD21 on the surface  
103 of a B cell line, an additional gp350 epitope was identified in the C-terminal region of gp350 (aa 822-841),  
104 suggesting it is involved in EBV invasion of B cells (35). The role of other epitopes in eliciting nAbs has not  
105 been fully investigated. Furthermore, the exact aa residues that comprise the core binding sites for epitopes  
106 capable of eliciting neutralizing and non-nAbs have not been determined. Mapping the EBV gp350 protein  
107 residues that define immunodominant epitopes, identifying the critical aa residues of the known and unknown  
108 epitopes, and defining their roles in generating neutralizing and non-nAbs will guide rational design and  
109 construction of an efficacious EBV gp350-based vaccine that would focus B-cell responses to the protective  
110 epitopes.

111 In this study, we generated 23 hybridomas producing antibodies against EBV gp350. To assess their  
112 clinical potential and utility in informing future prophylactic and therapeutic vaccine design, we: (1) tested the  
113 ability of the antibodies produced by the new hybridomas to detect gp350 protein by enzyme-linked  
114 immunosorbent assay (ELISA), flow cytometry, and immunoblot; (2) sequenced the unique complementarity-  
115 determining regions (CDRs) of the heavy and light chains of all 23 hybridomas to identify novel mAbs; (3)  
116 measured the efficacy of each mAb to neutralize EBV infection *in vitro*; and (4) used RepliTope peptide  
117 microarrays to identify gp350 core aa residues recognized by neutralizing and non-neutralizing mAbs. Using  
118 the newly generated antibodies, we identified a new epitope bound preferentially by nAbs, distinct from the

119 canonical neutralizing epitope bound by nAb-72A1, as well as two immunodominant epitopes bound by both  
120 neutralizing and non-nAbs.

## 122 **Results**

123 **Characterization of new anti-gp350 mAbs.** We generated and biochemically characterized new EBV gp350-  
124 specific mAbs, and evaluated their ability to neutralize EBV infection. In addition, we used the antibodies to  
125 map immunodominant epitopes on the EBV gp350 protein. To generate hybridomas, we immunized BALB/c  
126 mice with purified UV-inactivated EBV, boosted them with virus-like particles (VLPs) that incorporate the  
127 EBV gp350 ectodomain on the surface to enrich for production of anti-gp350 antibodies, then isolated  
128 splenocytes from the immunized mice and fused them with myeloma cells. We used indirect ELISA to screen  
129 supernatants from the hybridomas for specificity against purified EBV gp350 ectodomain protein (aa 4–863)  
130 and identified 23 hybridomas producing gp350-specific antibodies.

131 We determined the isotypes of the new antibodies to be IgG1 (n=14), IgG2a (n=5), IgG2b (n=1), a  
132 mixture of IgG1 and IgG2b (n=1), and a mixture of IgG1 and IgM (n=2). We found that all 23 hybridomas that  
133 produced antibodies (designated HB1–23) recognized the gp350 antigen in an initial ELISA screening using  
134 unfractionated and unpurified hybridoma supernatants (data not shown). We used affinity purification with  
135 protein A followed by SDS-PAGE to confirm the purity of all 23 antibodies. When we re-evaluated quantified  
136 amount of the purified antibodies (10 µg/ml) using indirect ELISA, all of the 23 antibodies had ELISA signals  
137 two times greater than those of phosphate buffered saline (negative control), and were considered as positive or  
138 specific to gp350. Of these, five (HB4, HB5, HB7, HB13, and HB14) demonstrated binding affinity equal to or  
139 greater than that of the positive control, nAb-72A1 (**Fig. 1A**). This difference in binding of the 23 antibodies  
140 could be due to differential exposure of cognate epitopes on gp350 in the assay performed.

141 Determining the nature of the binding between an antibody and its target antigen is an important  
142 consideration for the performance and specificity of an antibody, as it can involve the recognition of a linear or  
143 conformational epitope (26). We characterized the antibodies using immunoblot analysis of denatured gp350  
144 antigen expressed from Chinese hamster ovary (CHO) cells, and showed that 16 of the antibodies reacted to  
145 both the 350 kDa and the 220 kDa splice variant. In contrast, HB2, HB3, HB6, HB7, HB13, HB20, and HB21  
146 failed to recognize either of the denatured isoforms of gp350 (**Fig. 1B**). We further characterized the antibodies  
147 using flow cytometric analysis of CHO cells stably expressing gp350 on the cell surface, and revealed that HB1,  
148 HB2, HB3, HB5, HB6, HB9, HB11, HB12, HB15, HB17, HB19, HB20, and HB21 antibodies readily  
149 recognized gp350 (**Fig. 1C**). Given that HB2, HB3, HB20, and HB21 detected gp350 by flow cytometry, but  
150 not by immunoblot, suggests that these four antibodies recognized conformational epitopes (native) on gp350,  
151 whereas HB5, HB9, HB11, HB15, HB17, and HB19 recognized both linear and conformational epitopes (**Fig.**  
152 **1B-C**). The observation that all 23 anti-gp350 antibodies recognized the gp350 antigen either by indirect  
153 ELISA, flow cytometry, or immunoblot assay suggests that we successfully produced antibodies that are  
154 specific to EBV gp350 protein.

155 **Analysis of the variable heavy and variable light chain sequences.** We determined the sequences of the  
156 heavy and light chain variable region genes ( $V_H$  and  $V_L$ , respectively) of the 23 new anti-gp350 antibodies, as  
157 well as nAb-72A1, and compared the sequences to published nAb-72A1 sequences (10, 33). The sequence of  
158 the CDR of this antibody was recently determined and published, revealing two unique IgG1 heavy chains and  
159 two unique light chains, one kappa and one lambda (10, 33). We used PCR to amplify the genes encoding the  
160  $V_H$  and  $V_L$  chain regions in cDNA generated from the 23 hybridoma cells, as well as from HB168 (nAb-72A1).  
161 The PCR products presented distinct bands at approximately 350–400 bp and 450–500 bp for  $V_H$  and  $V_L$ ,  
162 respectively (data not shown). We sequenced purified fragments using Illumina MiSeq, followed by *in silico*  
163 analysis and identified CDRs for both  $V_H$  and  $V_L$  (**Fig. 2**). We identified two  $V_H$  and  $V_L$  sequences of nAb-



164 72A1 as >94% identical to the previously published sequences (10), suggesting that nAb-72A1 exists as a  
165 mixed antibody, instead of the reported mAb (33). Similar to nAb-72A1, HB4, HB13, HB15, and HB23  
166 hybridomas each produced a mixture of two antibodies, with unique sequences of the V<sub>H</sub> chain showing at >5%  
167 frequencies, suggesting that they are not mAbs (**Table 1**). We were unable to identify coding sequences for V<sub>L</sub>  
168 chains for HB7, HB9, and HB17, unless the frequencies were lowered to >1% (**Table 1**); in this case, the  
169 identified coding V<sub>L</sub> chain sequences were identical.

170 Our analysis and comparison of the V<sub>H</sub> and V<sub>L</sub> chain gene sequences of the 23 hybridomas compared to  
171 HB168 (nAb-72A1) showed unique sequences within the CDR 1–3 regions. Only HB8 and HB18 had identical  
172 V<sub>H</sub> and V<sub>L</sub> chain gene sequences, suggesting that the two are the same clone isolated separately; therefore,  
173 HB18 was excluded from subsequent experiments. One of the two HB15 antibodies had identical V<sub>H</sub> and V<sub>L</sub>  
174 gene sequences to that of HB10; however, based on the previous characterization, the presence of the additional  
175 antibody in HB15 was sufficient to confer subtle differences in biochemical characterizations for gp350  
176 between the two antibodies. Thus, sequence analysis (**Fig. 2**) demonstrated that we generated 15 unique anti-  
177 gp350 mAbs, with distinct biochemical properties and sequence identities from the commercially available  
178 nAb-72A1.

179 **Neutralization assay.** We evaluated the ability of the 15 mAbs (10 µg/ml or 50 µg/ml) to neutralize  
180 purified eGFP-tagged AGS-EBV infection of the Raji B cell line *in vitro* following standardized procedures  
181 (25) and determined the percentage of eGFP<sup>+</sup> cells using flow cytometry as described (17, 18). We used the  
182 nAbs 72A1 and anti- gH/gL (E1D1) as positive controls, whereas the non-neutralizing mAb 2L10 was used as a  
183 negative control. Because HB4, HB7, HB13, HB15, HB16, HB19, HB21, and HB23 were confirmed to be  
184 mixtures based on isotyping or sequence data, we eliminated them from further consideration in the  
185 neutralization assay. We considered an antibody to be a neutralizer if it inhibited EBV infection >20% at 10  
186 µg/ml and >60% at 50 µg/ml. Several mAbs inhibited EBV infection in a dose-dependent manner. HB20 and

187 HB17 were the most effective in neutralizing EBV infection of Raji cells *in vitro*, whereby they reduced  
188 infection by 40% and >60%, and >30% and 80%, at 10 µg/ml and 50 µg/ml, respectively (**Fig. 3**). The HB9 and  
189 HB10 antibodies prevented EBV infection of Raji cells by ~25% at 10 µg/ml and ~60% at 50 µg/ml. The HB11  
190 antibody neutralized <20% at 10 µg/ml, but showed a dose-dependent increase at 50 µg/ml by neutralizing EBV  
191 infection by 60%. By the set neutralization parameters, HB1–3, HB5–8, HB12, HB14, and HB22 did not  
192 neutralize EBV infection of Raji cells. In comparison, both nAb-72A1 and nAb-E1D1 neutralized EBV  
193 infection by >70% and 40%, respectively, at 10 µg/ml. The nAb-72A1 neutralized 100% of EBV infection at 50  
194 µg/ml, whereas nAb- E1D1 neutralized infection by >60% at 50 µg/ml. As expected, the negative control,  
195 mAb-2L10, did not neutralize viral infection at either concentration. From the neutralization assay results, we  
196 organized the remaining 15 mAbs into two distinct groups, neutralizers (+) and non-neutralizers (-) as  
197 summarized in **Table 2**.

198 **Epitope Mapping.** We used the 15 new anti-gp350 mAbs (neutralizers vs. non-neutralizers) to identify  
199 most, if not all, of the relevant immunodominant aa residues targeted by both the neutralizing and non-nAbs.  
200 We used a RepliTope approach, in which overlapping peptides [15-mer with 11 aa overlap] that cover the  
201 complete sequence of gp350 (aa 1–907) were immobilized on microarray slides and probed with the purified  
202 anti-gp350 antibodies in an ELISA format. The nAb-72A1 was as positive control, because the cognate epitopes  
203 bound by the antibody have previously been reported.

204 We showed that two epitopes, <sup>253</sup>TPIPGTGYAYSLRLTPRPVSRFL<sub>275</sub> and  
205 <sup>393</sup>VSGLGTAPKTLIITRTATNATTT<sub>415</sub>, were both bound by all 15 mAbs, as well as nAb-72A1 and 2L10,  
206 regardless of their neutralizing or non-neutralizing capabilities (**Fig. 4**). This consensus suggests that these  
207 epitopes are immunodominant. Several of the 15 mAbs (HB2, HB3, HB8, HB11, HB12, HB14, HB17, and  
208 HB22), as well as nAb-72A1, bound to <sup>341</sup>ANSPNVTVTAFWAWPNNTE<sub>359</sub>. Two epitopes, aa 341–359 and  
209 aa 393–415, were found within the previously identified single epitope II, which is encoded by nucleotides

between 3,186 bp and 3,528 bp, corresponding to aa 326–439 of gp350 (37). Two mAbs, HB1 and HB10, bound <sub>605</sub>**TTTPNATGPTVGETSPQA**<sub>623</sub>, an epitope located within the gp350 (aa 501–699) splice region that is involved in generation of the 220 kDa splice variant. A total of eight mAbs (HB1–3, HB8, HB10–12, and HB22) also bound to the region between <sub>1</sub>**MEAALLVCQYTIQSLIHLTGEDPG**<sub>24</sub>, which includes a region homologous to C3d, another molecule known to interact with CD21 (15, 33). Two epitopes common between most neutralizing and non-nAbs, <sub>821</sub>**PPSTSSKLRPRWFTFTSPPV**<sub>839</sub> and <sub>875</sub>**LLLLVMADCAFRRNLSTSHTYTPPY**<sub>899</sub>, were located upstream and downstream, respectively, of the transmembrane domain on the C-terminus of gp350. Epitope aa 821–839 is located within the previously identified epitope I, which is located between aa 733–841 (37). Furthermore, epitope aa 821–839 is potentially involved in EBV infection of B cells (35). However, our study could not identify two epitopes located at aa 282–301 and aa 194–211, which were previously shown to be involved in the binding of nAb-72A1 and CD21, respectively (30, 33, 35). Similar to previously reported data, we showed that nAb-72A1 bound <sub>145</sub>**EMQNPVYLIPETVPYIKWDN**<sub>164</sub>, one of the neutralizing epitopes on gp350 (30, 33, 35).

Analysis of V<sub>H</sub>-V<sub>L</sub> sequences from the HB168 (nAb-72A1) hybridoma by our group and others revealed that the hybridoma produces two antibodies: one that is gp350-specific and another that recognizes mineral oil-induced plasmacytoma (MOPC)(10). To further interrogate gp350 for additional neutralizing epitopes, we used the gp350-specific nAb-72A1 V<sub>H</sub>-V<sub>L</sub> sequence to generate chimeric (mouse/human) recombinant antibodies. Similarly, we used the V<sub>H</sub>-V<sub>L</sub> sequence for the HB20 antibody, which our neutralization analysis above showed to be one of the most effective nAbs, to generate chimeric antibodies. We generated a negative control chimeric recombinant antibody using V<sub>H</sub>-V<sub>L</sub> sequences from the gp350-specific but non-neutralizing HB5 antibody described above (**Fig. 3**).

We performed comparative analysis of the epitope binding pattern using the chimeric recombinant antibodies and revealed a novel epitope, <sub>381</sub>**GAFASNRFTDIT**<sub>392</sub>, which was bound by HB20 and nAb-72A1,

233 but not by HB5, and is distinct from the <sub>145</sub>EMQNPVYLIPETVPYIKWDN<sub>164</sub> epitope, which is bound only by  
234 the nAb-72A1 (**Fig. 5**).

## 236 Discussion

237 Despite more than 50 years of EBV vaccine research, few candidates have demonstrated even partial clinical  
238 efficacy, and none have been efficacious enough to elicit sterilizing immunity and be licensed (3). Antibodies,  
239 whether elicited in the host naturally or via passive immunization, provide an effective first-line of defense  
240 against viral infection. Several studies have indicated that the major immunodominant glycoprotein EBV gp350  
241 is an ideal target for EBV nAbs production. Although the ectodomain of EBV gp350 (aa 1–841) contains at  
242 least eight unique CD21 binding epitopes, only one of these epitopes (aa 142–161) is capable of eliciting nAbs  
243 (30, 32, 35). Although the aa residues that constitute the other epitopes and their role in generating nAbs have  
244 not been elucidated, this information would be valuable in the precise design of effective EBV peptide vaccines.  
245 To date, nAb-72A1 remains the only EBV antibody with proven clinical prophylactic efficacy; it confers short-  
246 term protection by reducing and delaying EBV infection onset in immunized pediatric transplant patients (21).

247 In this study we generated 23 hybridomas producing gp350-specific antibodies and characterized their  
248 ability to bind gp350 protein (**Fig. 1**). Out of the 23 hybridomas, we determined that 15 were monoclonal and  
249 novel based on their V<sub>H</sub> and V<sub>L</sub> CDR sequences, compared to the reported sequence of nAb-72A1 (22) (**Fig. 2**)

250 Following confirmation that the new mAbs recognized EBV gp350 antigen and contained unique V<sub>H</sub>-V<sub>L</sub>  
251 sequences, our further characterization revealed that mAbs HB9, HB10, HB11, HB17, and HB20 inhibited EBV  
252 infection in a dose-dependent manner, with HB17 and HB20 being the best neutralizers (**Fig. 3**). Thus, our  
253 study provides new neutralizing and non-nAbs against EBV infection, which could potentially inform future  
254 EBV vaccine research.

255 Various methods, including lectin/ricin immune-affinity assay (34), purified mAbs (1, 22), purified  
256 soluble gp350 mutants, synthetic peptides (15, 16, 33), cell binding assays (35), and crystal structure of partial  
257 gp350 protein (aa 4–443) (30), have been used to identify the critical gp350 epitopes responsible for its  
258 interaction with the CD35 and CD21 cellular receptors (*for a detailed summary review see Table 3*). We used  
259 an epitope mapping assay to identify a total of nine epitopes, including two new epitopes, and one bound by all  
260 mAbs, including nAb-72A1 and 2L10, regardless of the mAb neutralizing capability to EBV infection. This  
261 suggests it is an immunodominant epitope on the gp350 protein. We further identified portions of four of the  
262 previously described epitopes, including the only currently recognized neutralizing epitope, and defined their  
263 exact aa residues. However, we could not identify two previously reported epitopes located at aa 282–301 and  
264 aa 194–211, which have been reported to be involved in the binding of nAb-72A1 or CD21, respectively (30,  
265 33, 35) (**Fig. 4**).

266 Our comparative epitope mapping analysis results identified a novel neutralizing epitope,  
267 <sup>381</sup>GAFASNRTFDIT<sub>392</sub>, which was bound preferentially by the nAbs HB20 and nAb-72A1, but not the non-  
268 neutralizing mAb HB5 (**Fig. 5**). The new neutralizing epitope is distinct from the reported canonical nAb-72A1-  
269 binding epitope aa 145–164, on gp350, suggesting that epitope 381–392 is a novel epitope on gp350 that might  
270 be capable of eliciting nAbs.

271 In conclusion, in this study we generated 15 novel EBV gp350-specific mAbs, characterized their binding  
272 to gp350, determined their neutralization activity against EBV infection *in vitro*, mapped their cognate epitopes,  
273 and defined the exact aa residues they recognize on gp350. We confirmed six of the eight previously described  
274 epitopes responsible for generating neutralizing and non-nAbs and defined the exact aa residues they bind. This  
275 study also confirmed that the binding epitopes on gp350 that elicit nAbs are between aa 4–443 (30). We  
276 identified an additional neutralizing epitope and two new non-neutralizing epitopes, with one located  
277 downstream of the gp350 ectodomain (aa 1–841). The newly developed mAbs will be useful research tools for

informing future vaccine development, diagnosis of viral infection, or therapeutic/prophylactic management of post-transplant lymphoproliferative diseases, either individually, in combination with nAb-72A1, or with other mAbs such as neutralizing anti-gH/gL (E1D1).

## Materials and Methods

**Cells and viruses.** EBV-AGS, a human gastric carcinoma cell line infected with a recombinant Akata virus expressing enhanced fluorescent green protein (eGFP) was a kind gift of Dr. Liisa Selin (University of Massachusetts Medical School). Anti-EBV gH/gL (E1D1) hybridoma cell line was a kind gift of Dr. Lindsey Hutt-Fletcher (Louisiana State University Health Sciences Center). Chinese hamster ovary cells (CHO); human embryonic kidney cells expressing SV-40 T antigen (HEK-293T); HEK-293 6E suspension cells; EBV-positive Burkitt lymphoma cells (Raji); myeloma cells (P3X63Ag8.653); and anti-EBV gp350 nAb-72A1 hybridoma cells (HB168) were purchased from American Type Culture Collection (ATCC). EBV-AGS cells were maintained in Ham's F-12 media supplemented with 500 µg/ml neomycin (G418, Gibco). Raji, P3X63Ag8.653, and HB168 hybridoma cells were maintained in RPMI 1640. CHO and HEK-293T cells were maintained in DMEM. HEK-293 6E cells were maintained in FreeStyle F17 Expression Medium supplemented with 0.1% Pluronic F-68. All culture media were supplemented with 10% fetal bovine serum (FBS), 2% penicillin-streptomycin, and 1% l-glutamine, with the exception of Freestyle F17 expression medium.

**Antibodies and plasmids.** Primary antibodies: EBV anti-gp350 nAb (72A1) and anti-gH/gL (E1D1) were purified from the supernatant of HB168 and E1D1 hybridoma cell lines, respectively using Capturem™ Protein A Maxiprep spin columns (Takara). Anti-gp350/220 mAb (2L10) was purchased from Millipore Sigma.

Secondary antibodies: Horseradish peroxidase (HRP)-conjugated goat anti-mouse IgG for immunoblot or ELISA were purchased from Bio-Rad. Alexa Fluor® (AF) 488-conjugated goat anti-mouse IgG (H+L) for flow

300 cytometry was purchased from Life Sciences Tech. Goat anti-mouse IgG (H+L) secondary antibody and  
301 DyLight 650 for epitope mapping were purchased from Thermo Fisher Scientific.

302 The construction of the pCI-puro vector and pCAGGS-gp350/220-F has been described (17, 20).

303 **Virus production and purification.** eGFP-tagged EBV was produced from the EBV-infected AGS cell  
304 line as described (29). Briefly, EBV-AGS cells were seeded to 90% confluency in T-75 flasks in Ham's F-12  
305 medium containing G418 antibiotic. After the cells reached confluency, G418 media was replaced with Ham's  
306 F-12 medium containing 33 ng/ml 12-O-tetradecanoylphorbol-13-acetate (TPA) and 3 mM sodium butyrate  
307 (NaB) to induce lytic replication of the virus. Twenty-four h post-induction, the media was replaced with  
308 complete Ham's F-12 media without G418, TPA, or NaB and cells were incubated for 4 days at 37°C. The cell  
309 supernatant was collected, centrifuged, and filtered using a 0.8- $\mu$ m filter to remove cell debris. The filtered  
310 supernatant was ultra-centrifuged using a Beckman-Coulter type 19 rotor for 70 min at 10,000 rpm to pellet the  
311 virus. EBV-eGFP virus was titrated in both HEK-293T cells and Raji cells, and stocks were stored at -80°C for  
312 subsequent experiments.

313 **Generation and purification of gp350 virus-like particles.** To generate gp350 VLPs, equal amounts (8  
314  $\mu$ g/plasmid) of the relevant plasmids (pCAGGS-Newcastle disease virus [NDV]-M, -NP, and gp350  
315 ectodomain fused to fusion protein cytoplasmic and transmembrane domains) were co-transfected into 80%  
316 confluent CHO cells seeded in T-175cm<sup>2</sup> flasks; supernatant from transfected cells was collected and VLPs  
317 were purified and composition characterized as previously described (18).

318 **Production of hybridoma cell lines.** Seven days prior to immunization, two eight-week-old BALB/c  
319 mice were bled for collection of pre-immune serum. The mice were immunized with purified UV-inactivated  
320 EBV three times (Day 0, 21, and 35) and boosted every 7 days three times (Day 42, 49, and 56) with VLPs  
321 incorporating gp350 on the surface after Day 35. The mice were sacrificed and their splenocytes were isolated,  
322 purified, and used to fuse with P3X63Ag8.653 myeloma cells at a ratio of 3:1 in the presence of polyethylene



glycol (PEG, Sigma). Hybridoma cells were seeded in flat-bottom 96-well plates and selected in specialized hybridoma growth media with HAT (Sigma) and 10% FBS.

**Indirect ELISA.** Hybridoma cell culture supernatant from wells that had colony-forming cells were tested for antibody production by indirect ELISA. Briefly, immunoplates (Costar 3590; Corning Incorporated) were coated with 50  $\mu$ l of 0.5  $\mu$ g/ml recombinant EBV gp350/220 (Millipore) protein diluted in phosphate buffered saline (PBS, pH 7.4) and incubated overnight at 4°C. After washing three times with PBS containing 0.05% (v/v) Tween 20 (washing buffer), plates were blocked with 100  $\mu$ l washing buffer containing 2% (w/v) bovine serum albumin (BSA), incubated for 1 h at room temperature, and washed as above. 100  $\mu$ l of hybridoma supernatant was added to each well (in triplicate) and incubated for 2 h at room temperature. PBS and nAb-72A1 were added as negative and positive controls, respectively. The plates were washed as described above, followed by incubation with goat anti-mouse IgG horseradish peroxidase-conjugated secondary antibody (1:2,000 diluted in PBS) at room temperature for 1 h. The plates were washed again and the chromogenic substrate 2,2'-azino-bis (3-ethylbenzothiazoline-6-sulphonic acid) (ABTS, Life Science Technologies) was added. The reaction was stopped using ABTS peroxidase stop solution containing 5% sodium dodecyl sulfate (SDS) in water. The absorbance was read at an optical density of 405 nm using an ELISA reader (Molecular Devices). Three independent experiments were performed.

**Antibody purification, quantification, and isotyping.** Hybridoma cells from selected individual positive clones were expanded stepwise from 96-well plates to T-75 flasks. At confluence in T-75 flasks, supernatant from individual clones was collected, clarified by centrifugation (4,000 g, 10 min, 4°C), and filtered through a 0.22- $\mu$ m-membrane filter (Millipore). Antibodies were further purified using Capturem™ Protein A Maxiprep (Takara) and stored in PBS (pH 7.4) at 4°C. Antibodies were analyzed by SDS-PAGE to determine purity. Bicinchoninic acid assay (BCA assay; Thermo Fisher Scientific) was conducted to determine the concentration



345 of purified antibodies. Isotype identification was performed with the Rapid ELISA mouse mAb isotyping kit  
346 (Thermo Fisher Scientific).

347 **RNA extraction, cDNA synthesis, and sequencing of the variable region of the mAbs.** Total RNA was  
348 extracted from  $1 \times 10^6$  hybridoma cells using the RNeasy Mini Kit (Qiagen). Each hybridoma clone cDNA was  
349 synthesized in a total volume of 20  $\mu$ l using Tetro Reverse Transcriptase (200 u), RiboSafe RNase Inhibitor,  
350 Oligo(dT)18 primer, dNTP mix (10 mM each nucleotide), and 100–200 ng RNA. Reverse transcription was  
351 performed at 45°C for 30 min, and terminated at 85°C for 5 min. The cDNA was stored at -20°C.  
352 Immunoglobulin (Ig) V<sub>H</sub> and V<sub>L</sub> were amplified using the mouse Ig-specific primer set purchased from  
353 Novagen (12). The V<sub>H</sub> and V<sub>L</sub> genes were amplified in separate reactions and PCR products were visualized on  
354 1% agarose gel.

355 The V<sub>H</sub> and V<sub>L</sub> amplicons were sequenced using an Illumina MiSeq platform: duplicate 50  $\mu$ l PCR  
356 reactions were performed, each containing 50 ng of purified cDNA, 0.2 mM dNTPs, 1.5 mM MgCl<sub>2</sub>, 1.25 U  
357 Platinum Taq DNA polymerase, 2.5  $\mu$ l of 10x PCR buffer, and 0.5  $\mu$ M of each primer designed to amplify the  
358 V<sub>H</sub> and V<sub>L</sub>. The amplicons were purified using AxyPrep Mag PCR Clean-up kit (Thermo Fisher Scientific).  
359 The Illumina primer PCR PE1.0 and index primers were used to allow multiplexing of samples. The library was  
360 quantified using ViiA™ 7 Real-Time PCR System (Life Technologies) and visualized for size validation on an  
361 Agilent 2100 Bioanalyzer (Agilent Technologies) using a high-sensitivity cDNA assay. The sequencing library  
362 pool was diluted to 4 nM and run on a MiSeq desktop sequencer (Illumina). The 600-cycle MiSeq Reagent Kit  
363 (Illumina) was used to run the 6 pM library with 20% PhiX (Illumina), and FASTQ files were used for data  
364 analysis(19).

365 **Chimeric mAb construct generation.** To generate chimeric mAbs, the V<sub>H</sub> and V<sub>L</sub> sequences were cloned  
366 into the dual-vector system pFUSE CHIg/pFUSE CLIg (InvivoGen), which express the constant region of the  
367 heavy and light chains of human immunoglobulins, respectively (Genewiz). The constructs were transiently

368 transfected into HEK-293 6E cells. The supernatants were collected at 72 h post-transfection and IgG was  
369 purified using protein A/G affinity chromatography.

370 **Immunoblot analysis.** CHO cells were cultured and stably co-transfected with pCAGGS-gp350/220 F  
371 and pCI-puro vector containing a puromycin resistance gene. Forty-eight h post-transfection, DMEM media  
372 containing 10 µg/ml of puromycin was added to enrich for cells expressing gp350 protein. Puromycin-resistant  
373 clones were expanded, followed by flow cytometry sorting using nAb-72A1 to a purity >90%. EBV gp350-  
374 positive CHO cells were harvested and lysed in radioimmunoprecipitation assay buffer (RIPA) followed by  
375 centrifugation at 15,000 g for 15 min on a benchtop centrifuge. The supernatants were collected and heated at  
376 95°C for 10 min in SDS sample buffer containing β-mercaptoethanol, then separated using SDS-PAGE.  
377 Proteins were transferred onto a nitrocellulose membrane using an iBlot™ Transfer System (Thermo Fisher  
378 Scientific) followed by incubation in blocking buffer (1% BSA; 20 mM Tris-HCl, pH 7.5; 137 mM NaCl; and  
379 0.1% Tween-20 [TBST]) for 1 h. The blots were incubated in TBST containing purified anti-gp350 antibodies  
380 (1:50) overnight at 4°C. After three washes with TBST, the blots were incubated with a goat anti-mouse  
381 conjugated to horseradish peroxidase (1:2,000) in TBST for 1 h. After three washes, the antibody-protein  
382 complexes were detected using the Amersham ECL Prime Western Blotting Detection Reagent (GE  
383 Healthcare). All experiments were independently repeated three times.

384 **Flow cytometry.** To assess the ability of purified anti-gp350 mAb to detect surface expression of EBV  
385 gp350 protein by flow cytometry, CHO cells that stably express EBV gp350 were harvested and stained with  
386 purified anti-gp350 (10 µg/ml), followed by AF488 goat anti-mouse IgG secondary antibody. Flow cytometric  
387 analysis was performed on a C-6 FC (BD Biosciences) and data was analyzed using FlowJo Cytometry  
388 Analysis software (FlowJo, LLC) as described (18). All experiments were independently repeated three times.

389 **EBV neutralization assay.** Purified individual anti-gp350 mAbs were incubated with purified AGS-  
390 EBV-eGFP (titer calculated to infect at least 20% of HEK293 cells seeded in 100 µl of serum-free DMEM) for

2 h at 37°C. To represent EBV infection of B cells, the pre-incubated anti-gp350 mAbs/AGS-EBV-eGFP were used to infect  $5 \times 10^5$  Raji cells seeded in a 96-well plate. Anti-gp350 neutralizing 72A1 and non-neutralizing 2L10 mAbs served as positive and negative controls, respectively. Plates were incubated at 37°C and the number of eGFP+ cells was determined using flow cytometry 48 h post-infection. All dilutions were performed in quintuplicate and the assays repeated three times for Raji cells. Antibody EBV neutralization activity was calculated as: % neutralization =  $(EBV_{alone} - EBV_{mAb}) / (EBV_{alone}) \times 100$ .

**Epitope mapping.** Anti-gp350 mAbs were incubated with a multi-well EBV GP350/GP340 RepliTope (JPT) peptide microarray displaying 224 peptides (15-mers with 11 aa overlap) in 3x7 subarrays. Briefly, anti-gp350 mAbs were diluted in blocking solution (TBS-T and 2% BSA) to a final concentration of 10 µg/ml and incubated with the microarray slide for 1 h at 30°C with shaking. Slides were washed 5 times with wash buffer (TBS-T), followed by incubation with 1 µg/ml secondary antibody Dylight 650 (Thermo Fisher Scientific) for 1 h at 30°C. After washing 5 times with wash buffer and 2 times with distilled water, microarray slides were dried by centrifugation. Detection was performed using the Agilent DNA microarray scanner.

**Acknowledgments:** We are grateful to Lindsey Hutt-Fletcher for providing the EBV gH/gL (E1D1) hybridoma cell line, Liisa Selin for providing EBV Akata virus expressing eGFP, and Chao Guo for technical assistance with the RepliTope protocol.

This work was supported by the National Institute of Health (NIH) grant R21CA205106 and a generous philanthropic donation from the V Foundation to J.G.O. Research reported in this publication also included work performed in the City of Hope Integrative Genomics Core, Flow Cytometry Core, and Animal Resource Center supported by the National Cancer Institute of the National Institutes of Health under award number P30CA033572. The content is solely the responsibility of the authors and does not necessarily represent the

official views of the National Institutes of Health. We thank Dr. Sarah T. Wilkinson for editing of the manuscript and for her insightful feedback and discussion.

**Competing Interests:** The Authors declare that they have no competing interests.

## References

1. **Alfarano, C., C. E. Andrade, K. Anthony, N. Bahroos, M. Bajec, K. Bantoft, D. Betel, B. Bobechko, K. Boutilier, E. Burgess, K. Buzadzija, R. Cavero, C. D'Abreo, I. Donaldson, D. Dorairajoo, M. J. Dumontier, M. R. Dumontier, V. Earles, R. Farrall, H. Feldman, E. Garderman, Y. Gong, R. Gonzaga, V. Grytsan, E. Gryz, V. Gu, E. Haldorsen, A. Halupa, R. Haw, A. Hrvojic, L. Hurrell, R. Isserlin, F. Jack, F. Juma, A. Khan, T. Kon, S. Konopinsky, V. Le, E. Lee, S. Ling, M. Magidin, J. Moniakis, J. Montojo, S. Moore, B. Muskat, I. Ng, J. P. Paraiso, B. Parker, G. Pintilie, R. Pirone, J. J. Salama, S. Sgro, T. Shan, Y. Shu, J. Siew, D. Skinner, K. Snyder, R. Stasiuk, D. Strumpf, B. Tuekam, S. Tao, Z. Wang, M. White, R. Willis, C. Wolting, S. Wong, A. Wrong, C. Xin, R. Yao, B. Yates, S. Zhang, K. Zheng, T. Pawson, B. F. Ouellette, and C. W. Hogue.** 2005. The Biomolecular Interaction Network Database and related tools 2005 update. *Nucleic acids research* **33**:D418-424.
2. **Balfour, H. H., Jr.** 2014. Progress, prospects, and problems in Epstein-Barr virus vaccine development. *Curr Opin Virol* **6C**:1-5.
3. **Cohen, J. I.** 2015. Epstein-barr virus vaccines. *Clin Transl Immunology* **4**:e32.
4. **Connolly, S. A., J. O. Jackson, T. S. Jardetzky, and R. Longnecker.** 2011. Fusing structure and function: a structural view of the herpesvirus entry machinery: A structural view of herpesvirus entry machinery. *Nat Rev Microbiol* **9**:369-381.
5. **Cui, X., Z. Cao, Q. Chen, S. Arjunaraja, A. L. Snow, and C. M. Snapper.** 2016. Rabbits immunized with Epstein-Barr virus gH/gL or gB recombinant proteins elicit higher serum virus neutralizing activity than gp350. *Vaccine*.
6. **Fingeroth, J. D., J. J. Weis, T. F. Tedder, J. L. Strominger, P. A. Biro, and D. T. Fearon.** 1984. Epstein-Barr virus receptor of human B lymphocytes is the C3d receptor CR2. *Proc Natl Acad Sci U S A* **81**:4510-4514.
7. **Gu, S. Y., T. M. Huang, L. Ruan, Y. H. Miao, H. Lu, C. M. Chu, M. Motz, and H. Wolf.** 1995. First EBV vaccine trial in humans using recombinant vaccinia virus expressing the major membrane antigen. *Dev Biol Stand* **84**:171-177.
8. **Haque, T., I. Johannessen, D. Dombagoda, C. Sengupta, D. M. Burns, P. Bird, G. Hale, G. Mieli-Vergani, and D. H. Crawford.** 2006. A mouse monoclonal antibody against Epstein-Barr virus envelope glycoprotein 350 prevents infection both in vitro and in vivo. *J Infect Dis* **194**:584-587.
9. **Henle, G., and W. Henle.** 1979. The virus as the etiologic agent of infectious mononucleosis, p. 297-320, *The Epstein-Barr Virus*. Springer.
10. **Herrman, M., J. Muhe, C. Quink, and F. Wang.** 2015. Epstein-Barr Virus gp350 Can Functionally Replace the Rhesus Lymphocryptovirus Major Membrane Glycoprotein and Does Not Restrict Infection of Rhesus Macaques. *J Virol* **90**:1222-1230.

- 453 11. **Hoffman, G. J., S. G. Lazarowitz, and S. D. Hayward.** 1980. Monoclonal antibody against a 250,000-  
454 dalton glycoprotein of Epstein-Barr virus identifies a membrane antigen and a neutralizing antigen. Proc  
455 Natl Acad Sci U S A **77**:2979-2983.
- 456 12. **Jones, S. T., and M. M. Bendig.** 1991. Rapid PCR-cloning of full-length mouse immunoglobulin  
457 variable regions. Biotechnology (N Y) **9**:579.
- 458 13. **Luzuriaga, K., and J. L. Sullivan.** 2010. Infectious mononucleosis. N Engl J Med **362**:1993-2000.
- 459 14. **Moutschen, M., P. Leonard, E. M. Sokal, F. Smets, M. Haumont, P. Mazzu, A. Bollen, F.**  
460 **Denamur, P. Peeters, G. Dubin, and M. Denis.** 2007. Phase I/II studies to evaluate safety and  
461 immunogenicity of a recombinant gp350 Epstein-Barr virus vaccine in healthy adults. Vaccine **25**:4697-  
462 4705.
- 463 15. **Nemerow, G. R., R. A. Houghten, M. D. Moore, and N. R. Cooper.** 1989. Identification of an epitope  
464 in the major envelope protein of Epstein-Barr virus that mediates viral binding to the B lymphocyte  
465 EBV receptor (CR2). Cell **56**:369-377.
- 466 16. **Nemerow, G. R., C. Mold, V. K. Schwend, V. Tollefson, and N. R. Cooper.** 1987. Identification of  
467 Gp350 as the Viral Glycoprotein Mediating Attachment of Epstein-Barr-Virus (Ebv) to the Ebv/C3d  
468 Receptor of B-Cells - Sequence Homology of Gp350 and C3-Complement Fragment C3d. Journal of  
469 Virology **61**:1416-1420.
- 470 17. **Ogembo, J. G., L. Kannan, I. Ghiran, A. Nicholson-Weller, R. W. Finberg, G. C. Tsokos, and J. D.**  
471 **Fingerth.** 2013. Human complement receptor type 1/CD35 is an Epstein-Barr Virus receptor. Cell  
472 reports **3**:371-385.
- 473 18. **Ogembo, J. G., M. R. Muraswki, L. W. McGinnes, A. Parcharidou, R. Sutiwisesak, T. Tison, J.**  
474 **Avendano, D. Agnani, R. W. Finberg, and T. G. Morrison.** 2015. A chimeric EBV gp350/220-based  
475 VLP replicates the virion B-cell attachment mechanism and elicits long-lasting neutralizing antibodies in  
476 mice. Journal of Translational Medicine **13**:50.
- 477 19. **Pei, J., B.-H. Kim, and N. V. Grishin.** 2008. PROMALS3D: a tool for multiple protein sequence and  
478 structure alignments. Nucleic Acids Research **36**:2295-2300.
- 479 20. **Perez, E. M., J. Foley, T. Tison, R. Silva, and J. G. Ogembo.** 2016. Novel Epstein-Barr virus-like  
480 particles incorporating gH/gL-EBNA1 or gB-LMP2 induce high neutralizing antibody titers and EBV-  
481 specific T-cell responses in immunized mice. Oncotarget.
- 482 21. **Qualtiere, L. F., J. F. Decoteau, and M. Hassan Nasr-el-Din.** 1987. Epitope mapping of the major  
483 Epstein-Barr virus outer envelope glycoprotein gp350/220. J Gen Virol **68** ( Pt 2):535-543.
- 484 22. **Qualtiere, L. F., J. F. Decoteau, and M. H. Nasreldin.** 1987. Epitope Mapping of the Major Epstein-  
485 Barr-Virus Outer Envelope Glycoprotein Gp350/220. Journal of General Virology **68**:535-543.
- 486 23. **Rees, L., E. J. Tizard, A. J. Morgan, W. D. Cubitt, S. Finerty, T. A. Oyewole-Eletu, K. Owen, C.**  
487 **Royed, S. J. Stevens, R. C. Shroff, M. K. Tanday, A. D. Wilson, J. M. Middeldorp, P. L. Amlot,**  
488 **and N. M. Steven.** 2009. A phase I trial of epstein-barr virus gp350 vaccine for children with chronic  
489 kidney disease awaiting transplantation. Transplantation **88**:1025-1029.
- 490 24. **Rickinson, A. B., and E. Kieff.** 2007. Epstein-Barr Virus, p. 2680-2700. In D. Knipe and P. Howley  
491 (ed.), Fields Virology, Fifth ed, vol. 2. Lippincott Wilkins and Williams, Philadelphia.
- 492 25. **Sashihara, J., P. D. Burbelo, B. Savoldo, T. C. Pierson, and J. I. Cohen.** 2009. Human antibody titers  
493 to Epstein-Barr Virus (EBV) gp350 correlate with neutralization of infectivity better than antibody titers  
494 to EBV gp42 using a rapid flow cytometry-based EBV neutralization assay. Virology **391**:249-256.
- 495 26. **Sela, M., B. Schechter, I. Schechter, and F. Borek.** 1967. Antibodies to Sequential and  
496 Conformational Determinants. Cold Spring Harbor Symposia on Quantitative Biology **32**:537-545.



- 497 27. **Sitompul, L. S., N. Widodo, M. S. Djati, and D. H. Utomo.** 2012. Epitope mapping of gp350/220  
498 conserved domain of epstein barr virus to develop nasopharyngeal carcinoma (npc) vaccine.  
499 *Bioinformatics* **8**:479-482.
- 500 28. **Sokal, E. M., K. Hoppenbrouwers, C. Vandermeulen, M. Moutschen, P. Leonard, A. Moreels, M.**  
501 **Haumont, A. Bollen, F. Smets, and M. Denis.** 2007. Recombinant gp350 vaccine for infectious  
502 mononucleosis: a phase 2, randomized, double-blind, placebo-controlled trial to evaluate the safety,  
503 immunogenicity, and efficacy of an Epstein-Barr virus vaccine in healthy young adults. *The Journal of*  
504 *infectious diseases* **196**:1749-1753.
- 505 29. **Speck, P., and R. Longnecker.** 1999. Epstein-Barr virus (EBV) infection visualized by EGFP  
506 expression demonstrates dependence on known mediators of EBV entry. *Arch Virol* **144**:1123-1137.
- 507 30. **Szakonyi, G., M. G. Klein, J. P. Hannan, K. A. Young, R. Z. Ma, R. Asokan, V. M. Holers, and X.**  
508 **S. Chen.** 2006. Structure of the Epstein-Barr virus major envelope glycoprotein. *Nature structural &*  
509 *molecular biology* **13**:996-1001.
- 510 31. **Tanner, J., J. Weis, D. Fearon, Y. Whang, and E. Kieff.** 1987. Epstein-Barr virus gp350/220 binding  
511 to the B lymphocyte C3d receptor mediates adsorption, capping, and endocytosis. *Cell* **50**:203-213.
- 512 32. **Tanner, J., Y. Whang, J. Sample, A. Sears, and E. Kieff.** 1988. Soluble gp350/220 and deletion  
513 mutant glycoproteins block Epstein-Barr virus adsorption to lymphocytes. *J Virol* **62**:4452-4464.
- 514 33. **Tanner, J. E., M. Coincon, V. Leblond, J. Hu, J. M. Fang, J. Sygusch, and C. Alfieri.** 2015.  
515 Peptides designed to spatially depict the Epstein-Barr virus major virion glycoprotein gp350  
516 neutralization epitope elicit antibodies that block virus-neutralizing antibody 72A1 interaction with the  
517 native gp350 molecule. *J Virol* **89**:4932-4941.
- 518 34. **Thorley-Lawson, D. A., and K. Geilinger.** 1980. Monoclonal antibodies against the major  
519 glycoprotein (gp350/220) of Epstein-Barr virus neutralize infectivity. *Proc Natl Acad Sci U S A*  
520 **77**:5307-5311.
- 521 35. **Urquiza, M., R. Lopez, H. Patino, J. E. Rosas, and M. E. Patarroyo.** 2005. Identification of three  
522 gp350/220 regions involved in Epstein-Barr virus invasion of host cells. *The Journal of biological*  
523 *chemistry* **280**:35598-35605.
- 524 36. **Weiss, E. R., G. Alter, J. G. Ogembo, J. L. Henderson, B. Tabak, Y. Bakis, M. Somasundaran, M.**  
525 **Garber, L. Selin, and K. Luzuriaga.** 2017. High Epstein-Barr Virus Load and Genomic Diversity Are  
526 Associated with Generation of gp350-Specific Neutralizing Antibodies following Acute Infectious  
527 Mononucleosis. *J Virol* **91**.
- 528 37. **Zhang, P. F., M. Klutch, G. Armstrong, L. Qualtiere, G. Pearson, and C. J. Marcus-Sekura.** 1991.  
529 Mapping of the epitopes of Epstein-Barr virus gp350 using monoclonal antibodies and recombinant  
530 proteins expressed in *Escherichia coli* defines three antigenic determinants. *J Gen Virol* **72 ( Pt**  
531 **11)**:2747-2755.
- 532
- 533

#### 534 **Figure legends:**

535 FIG 1 Specificity of anti-gp350 antibodies. (A) ELISA screening of hybridoma (HB) supernatants for anti-  
536 gp350-specific antibodies. Soluble EBV gp350 protein was used as the target antigen at 0.5 µg/ml. nAb-72A1 at  
537 10 µg/ml and 1x phosphate buffered saline (PBS) were used as positive and negative (not shown) controls,

538 respectively. Bound antibodies were detected using HRP-conjugated anti-mouse IgG (1:2,000). Twenty-three  
539 HB clones with ELISA signals two times greater than those of PBS control were considered as positive  
540 hybridomas. (B) Determining specificity of anti-gp350-producing hybridoma supernatants by immunoblotting  
541 with gp350-transfected stable CHO lysate. (C) Flow cytometric analysis of surface expression of gp350 protein  
542 on gp350-expressing CHO cells. Cells were stained with anti-gp350 mAb (1:250), followed by secondary goat  
543 anti-mouse conjugated to AF488.

544  
545 FIG 2 PROMALS3D multiple sequence alignment of (A) V<sub>H</sub> and (B) V<sub>L</sub> regions of 15 mAbs and nAb-72A1.  
546 The highly variable complementarity determining regions (CDR) 1–3, indicated by black boxes, define the  
547 antigen binding specificity. The conserved framework regions (FR) 1–4 flank the CDRs. Consensus amino  
548 acids (aa) are in bold and upper case. Consensus-predicted secondary structure (ss) symbols: alpha-helix, h;  
549 beta-strand, e.

550  
551 FIG 3 Neutralization activity of novel anti-gp350 mAbs against EBV-eGFP in Raji cells. EBV-eGFP was pre-  
552 incubated with 15 anti-gp350 mAbs at (A) 10 µg/ml and (B) 50 µg/ml, followed by incubation with Raji cells  
553 for 48 h. EBV-eGFP<sup>+</sup> cells were enumerated using flow cytometry. Anti-gp350 (nAb-72A1) and anti-gH/gL  
554 (E1D1) mAbs served as positive controls and non-neutralizing anti-gp350 (2L10) mAb served as negative  
555 control.

556  
557 FIG 4 Identification of nine gp350 epitopes using 15 neutralizing and non-neutralizing mAbs. Residues in bold  
558 represent the gp220 splice variant region. Residues in red represent RepliTope-identified epitopes and exact  
559 residues. Italic residues represent canonical neutralizing epitope, underlined residues represents epitope bound  
560 by all assayed mAb.

561

562 FIG 5 Identification of novel gp350-neutralizing epitope by epitope mapping of neutralizing (nAb-72A1 and  
563 HB20) vs. non-neutralizing (HB5) anti-gp350 mAbs. Residue positions of nAb-72A1 (red), HB20 (blue), and  
564 HB5 (green) are indicated. Bold black residues represent splice variant region, underlined residues represent  
565 epitopes bound by nAb-72A1, HB20, and HB5. Italic residues represent epitopes bound by nAbs.  
566 Red residues represent epitopes bound by nAbs-72A1, blue residues represent residues bound by HB20 and  
567 green represents residues bound by HB5.

568



569  
570

Table 1. Summary of Illumina Dual Demultiplex of V<sub>H</sub> and V<sub>L</sub> regions.

| Sample       | Chain | Starting Pairs | PEAR Merged Reads | Length Filtered Reads | Primer Matched Reads | 3x Reads | >5% Unique Coding | >5% Unique Non-Coding |
|--------------|-------|----------------|-------------------|-----------------------|----------------------|----------|-------------------|-----------------------|
| <b>HB1</b>   | HEAVY | 51,641         | 51,210            | 46,655                | 32,482               | 22,725   | 1                 | 0                     |
|              | LIGHT | 280,048        | 279,012           | 100,725               | 68,041               | 58,570   | 1                 | 1                     |
| <b>HB2</b>   | HEAVY | 22,793         | 22,621            | 16,475                | 11,415               | 7,429    | 1                 | 0                     |
|              | LIGHT | 167,230        | 166,496           | 161,764               | 132,752              | 115,886  | 1                 | 1                     |
| <b>HB3</b>   | HEAVY | 26,382         | 26,162            | 25,542                | 16,910               | 11,709   | 1                 | 0                     |
|              | LIGHT | 12,681         | 12,609            | 11,753                | 9,809                | 8,023    | 1                 | 1                     |
| <b>HB4</b>   | HEAVY | 38,811         | 38,238            | 17,151                | 11,957               | 7,217    | 2                 | 0                     |
|              | LIGHT | 179,249        | 129,752           | 111,996               | 78,392               | 66,419   | 1                 | 1                     |
| <b>HB.5</b>  | HEAVY | 42,951         | 42,173            | 35,793                | 25,842               | 17,173   | 1                 | 0                     |
|              | LIGHT | 176,073        | 175,267           | 168,806               | 141,712              | 127,045  | 1                 | 1                     |
| <b>HB6</b>   | HEAVY | 26,142         | 25,981            | 22,245                | 15,658               | 10,453   | 1                 | 0                     |
|              | LIGHT | 171,996        | 171,370           | 167,730               | 138,348              | 122,397  | 1                 | 1                     |
| <b>HB7</b>   | HEAVY | 32,443         | 32,094            | 25,449                | 17,615               | 11,836   | 1                 | 0                     |
|              | LIGHT | 67,031         | 63,924            | 37,344                | 26,271               | 22,378   | 1                 | 1                     |
| <b>HB8</b>   | HEAVY | 140,091        | 103,349           | 92,744                | 58,292               | 31,583   | 1                 | 0                     |
|              | LIGHT | 151,244        | 115,527           | 102,439               | 82,154               | 70,803   | 1                 | 1                     |
| <b>HB9</b>   | HEAVY | 37,057         | 36,473            | 19,544                | 11,585               | 7,358    | 1                 | 0                     |
|              | LIGHT | 409,432        | 310,529           | 136,074               | 106,820              | 90,063   | 1                 | 2                     |
| <b>HB10</b>  | HEAVY | 38,181         | 37,981            | 26,043                | 17,104               | 11,391   | 1                 | 0                     |
|              | LIGHT | 114,255        | 112,498           | 106,914               | 84,368               | 75,370   | 1                 | 1                     |
| <b>HB11</b>  | HEAVY | 22,225         | 21,841            | 6,956                 | 4,408                | 2,465    | 1                 | 0                     |
|              | LIGHT | 106,465        | 102,278           | 65,332                | 50,232               | 44,527   | 1                 | 0                     |
| <b>HB12</b>  | HEAVY | 83,044         | 82,355            | 46,350                | 30,276               | 20,886   | 1                 | 0                     |
|              | LIGHT | 53,098         | 47,336            | 15,823                | 7,560                | 5,845    | 1                 | 1                     |
| <b>HB13</b>  | HEAVY | 81,451         | 80,372            | 47,995                | 32,216               | 20,139   | 2                 | 0                     |
|              | LIGHT | 27,314         | 24,774            | 8,987                 | 5,457                | 4,104    | 2                 | 1                     |
| <b>HB14</b>  | HEAVY | 76,299         | 75,357            | 28,309                | 19,104               | 12,939   | 1                 | 0                     |
|              | LIGHT | 153,011        | 149,264           | 48,474                | 29,710               | 25,133   | 1                 | 1                     |
| <b>HB.15</b> | HEAVY | 26,551         | 26,410            | 16,387                | 11,434               | 7,002    | 2                 | 0                     |
|              | LIGHT | 78,525         | 77,778            | 43,509                | 29,504               | 24,731   | 1                 | 1                     |
| <b>HB16</b>  | HEAVY | 54,249         | 53,943            | 9,517                 | 7,128                | 4,179    | 1                 | 0                     |
|              | LIGHT | 42,048         | 40,351            | 30,602                | 22,758               | 18,251   | 2                 | 1                     |
| <b>HB17</b>  | HEAVY | 111,614        | 110,882           | 81,428                | 50,844               | 35,949   | 1                 | 0                     |
|              | LIGHT | 102,490        | 100,488           | 83,925                | 65,925               | 57,727   | 1                 | 1                     |
| <b>HB18</b>  | HEAVY | 211,215        | 155,410           | 146,256               | 91,009               | 50,308   | 1                 | 0                     |
|              | LIGHT | 212,261        | 161,879           | 155,235               | 123,096              | 105,959  | 1                 | 1                     |
| <b>HB19</b>  | HEAVY | 109,692        | 82,221            | 20,546                | 12,587               | 7,274    | 1                 | 1                     |
|              | LIGHT | 70,828         | 69,744            | 62,572                | 48,354               | 42,051   | 1                 | 1                     |
| <b>HB20</b>  | HEAVY | 15,781         | 15,632            | 12,789                | 7,757                | 4,852    | 1                 | 0                     |
|              | LIGHT | 135,527        | 133,208           | 118,513               | 90,717               | 78,701   | 1                 | 1                     |
| <b>HB21</b>  | HEAVY | 15,312         | 15,202            | 8,577                 | 5,645                | 3,420    | 1                 | 0                     |
|              | LIGHT | 102,450        | 100,171           | 89,059                | 68,552               | 60,500   | 1                 | 1                     |
| <b>HB22</b>  | HEAVY | 217,959        | 156,488           | 154,008               | 95,755               | 50,245   | 1                 | 0                     |
|              | LIGHT | 205,334        | 156,986           | 143,386               | 108,728              | 85,136   | 1                 | 0                     |
| <b>HB23</b>  | HEAVY | 196,390        | 143,929           | 123,028               | 71,076               | 39,358   | 2                 | 0                     |
|              | LIGHT | 158,594        | 120,140           | 115,476               | 90,004               | 78,787   | 2                 | 0                     |

|             |       |         |         |         |         |        |   |   |          |
|-------------|-------|---------|---------|---------|---------|--------|---|---|----------|
| <b>72A1</b> | HEAVY | 213,480 | 158,199 | 156,215 | 107,395 | 68,486 | 2 | 0 | <b>§</b> |
|             | LIGHT | 187,216 | 140,964 | 132,945 | 105,783 | 91,208 | 1 | 1 |          |

571 \*= hybridoma with V<sub>L</sub> chain sequences identified with >1% frequency, **§** = hybridoma with more than  
572 one unique, plausible-coding V<sub>H</sub> chain sequence with > 5% frequency. The term “unique” refers to  
573 unique sequence counts (so, identical sequences found in a substantial frequency of merged reads,  
574 not necessarily unique compared to other samples).  
575

576

577 Table 2: Summarized biochemical and functional characterizations of anti-gp350 antibodies.

578

| Antibody             | IgG sub-class | Light chain | ELISA binding to purified EBV gp350/220 | FACS (CHO Cells) | Western blot | Neutralization activity |
|----------------------|---------------|-------------|-----------------------------------------|------------------|--------------|-------------------------|
| HB1                  | IgG1          | K           | +                                       | +                | +            | -                       |
| HB2                  | IgG2a         | K           | +                                       | +                | -            | -                       |
| HB3                  | IgG2a         | K           | +                                       | +                | -            | -                       |
| HB4                  | IgG1          | K           | +                                       | -                | +            | ND                      |
| HB5                  | IgG2a         | K           | +                                       | +                | +            | -                       |
| HB6                  | IgG1          | K           | +                                       | +                | -            | -                       |
| HB7                  | IgG1          | K           | +                                       | -                | -            | -                       |
| HB8                  | IgG1          | K           | +                                       | -                | +            | -                       |
| HB9                  | IgG2a         | K           | +                                       | +                | +            | +                       |
| HB10                 | IgG1          | K           | +                                       | -                | +            | +                       |
| HB11                 | IgG1          | K           | +                                       | +                | +            | +                       |
| HB12                 | IgG1          | K           | +                                       | +                | +            | -                       |
| HB13                 | IgG1          | K           | +                                       | -                | -            | ND                      |
| HB14                 | IgG1          | K           | +                                       | -                | +            | -                       |
| HB15                 | IgG1          | K           | +                                       | +                | +            | ND                      |
| HB16                 | IgG1/ IgM     | K           | +                                       | -                | +            | ND                      |
| HB17                 | IgG2b         | K           | +                                       | +                | +            | +                       |
| HB19                 | IgG1/ IgM     | K           | +                                       | +                | +            | ND                      |
| HB20                 | IgG2a         | K           | +                                       | +                | -            | +                       |
| HB21                 | IgG1/IgG2b    | K           | +                                       | +                | -            | ND                      |
| HB22                 | IgG1          | K           | +                                       | -                | +            | -                       |
| HB23                 | IgG1          | K           | +                                       | +                | +            | ND                      |
| 72A1                 | IgG1          | K           | +                                       | +                | +            | +                       |
| E1D1<br>(anti gH/gL) | IgG1          | K           | -                                       | -                | -            | +                       |

579 ND=Not determined, + = positive, - = negative, ELISA = enzyme-linked immunosorbent assay, κ =  
580 Kappa

581 Table 3. Summary of gp350 epitope mapping over time using various methodologies.

| Method                                                                                            | mAbs/protein/ peptides                                                                                         | Number of epitopes identified                                                                        | Reference                   |
|---------------------------------------------------------------------------------------------------|----------------------------------------------------------------------------------------------------------------|------------------------------------------------------------------------------------------------------|-----------------------------|
| Competitive binding assay: Tagged mAb vs. untagged mAb                                            | Newly generated mAbs                                                                                           | 8 epitopes – Sequence not defined                                                                    | Qualtiere et al., 1987 (21) |
| Binding studies: Determine the effects of anti-gp350 mAbs on gp350 binding to CR2                 | Newly generated mAbs                                                                                           | 2 possible regions identified by sequence alignment to C3d sequence:<br>1. aa 21–28<br>2. aa 372–378 | Nemerow et al., 1987 (16)   |
| Peptide digest and immunoprecipitation                                                            | Truncated and mutant protein; mAbs (72A1 and BOS-1)                                                            | Narrowed down to the first 470 residues                                                              | Tanner et al., 1988 (32)    |
| Binding studies                                                                                   | Peptide and protein                                                                                            | 2 sequences defined:<br>1. aa 21–28<br>2. N-terminus of gp350                                        | Nemerow et al., 1989 (15)   |
| Dot Blot immunoassay: Purified truncated protein incubated with mAbs                              | Protein – 8 clones overlapping N- and C-terminal portions of protein; mAbs from Qualtiere <i>et al.</i> , 1987 | 3 sequences defined:<br>1. aa 310–325<br>2. aa 326–439<br>3. aa 733–841                              | Zhang et al., 1991 (37)     |
| Peptide cell binding assay to 2 CR2-positive (Raji and Ramos) and 1 -negative (P3HR-1) cell lines | Synthesized peptides covering gp350 (907 aa)                                                                   | 7 regions, 3 identified:<br>1. aa 142–161<br>2. aa 282–301<br>3. aa 822–841                          | Urquiza et al., 2005 (35)   |
| Crystal structure and binding studies                                                             | Mutant proteins; mAbs 72A1                                                                                     | 3 epitopes (based on 72A1 binding and gp350 4-443)<br>1. aa 16-29<br>2. aa 142-161<br>3. aa 282-301  | Szakonyi et al., 2006 (30)  |
| Structural docking studies and antigenicity mapping                                               | gp350 and CR2 crystal structure alignment/docking                                                              | Single epitope (based on gp350 aa 1–470)<br>1. aa147–165                                             | Sitompul et al., 2012 (27)  |

|                                                                                        |                                                |                                                                                          |                             |
|----------------------------------------------------------------------------------------|------------------------------------------------|------------------------------------------------------------------------------------------|-----------------------------|
| Structural alignment:<br>computer modeling of<br>gp350 and 72A1 and<br>docking studies | Peptides (used in<br>immunization); mAb (72A1) | 4 epitopes: identified<br>1. aa 14-20<br>2. aa 144-161<br>3. aa 194-211<br>4. aa 288-291 | Tanner et al., 2015<br>(33) |
|----------------------------------------------------------------------------------------|------------------------------------------------|------------------------------------------------------------------------------------------|-----------------------------|

582

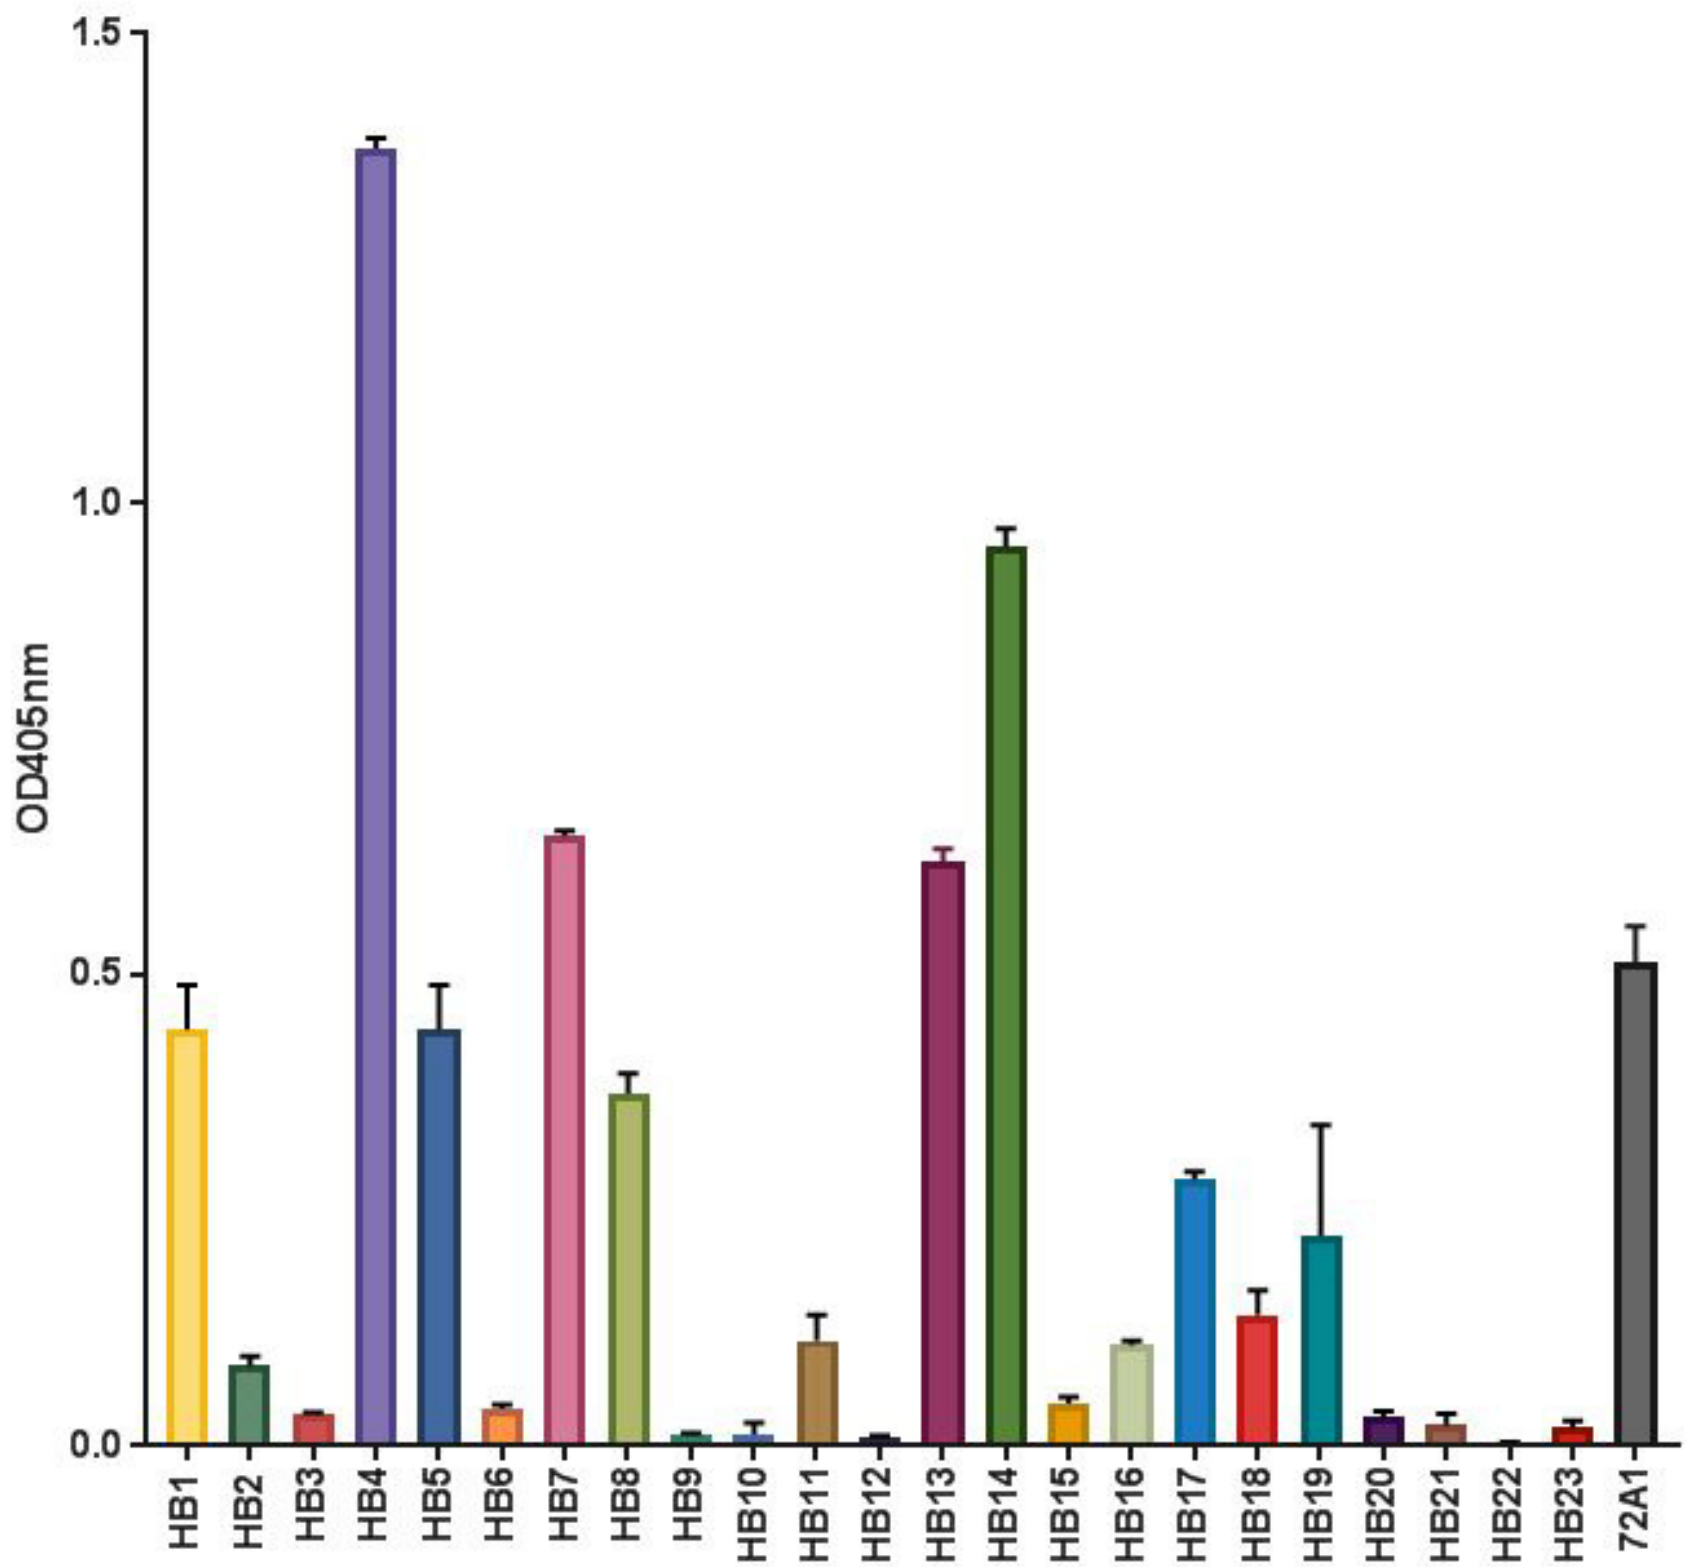

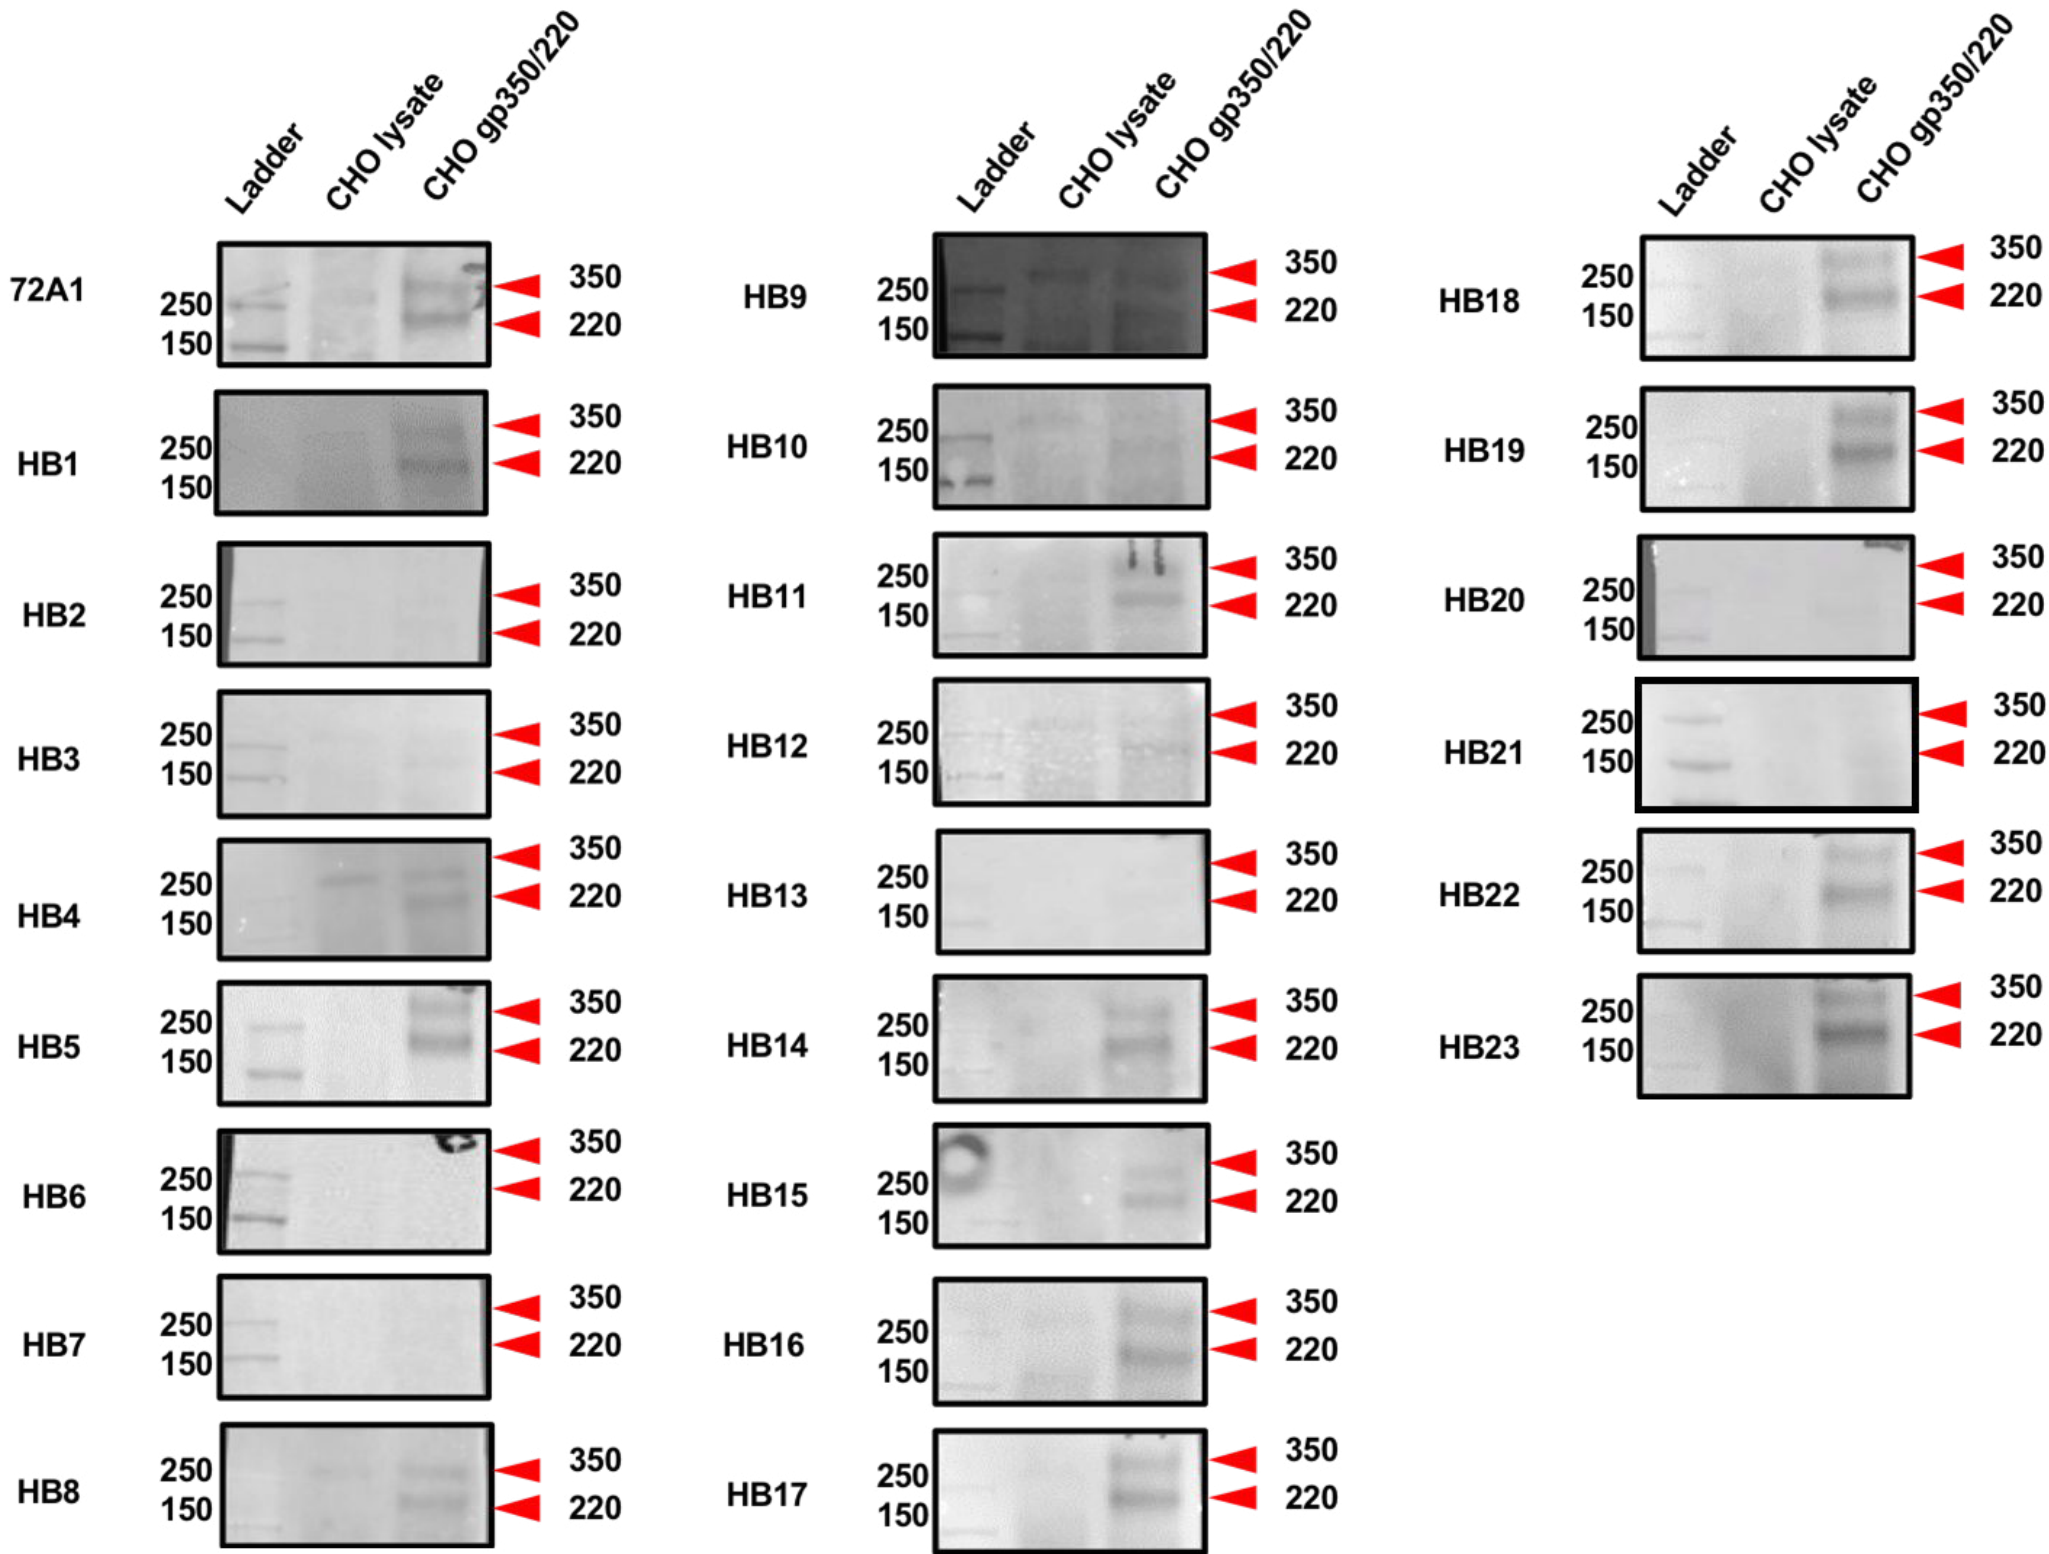

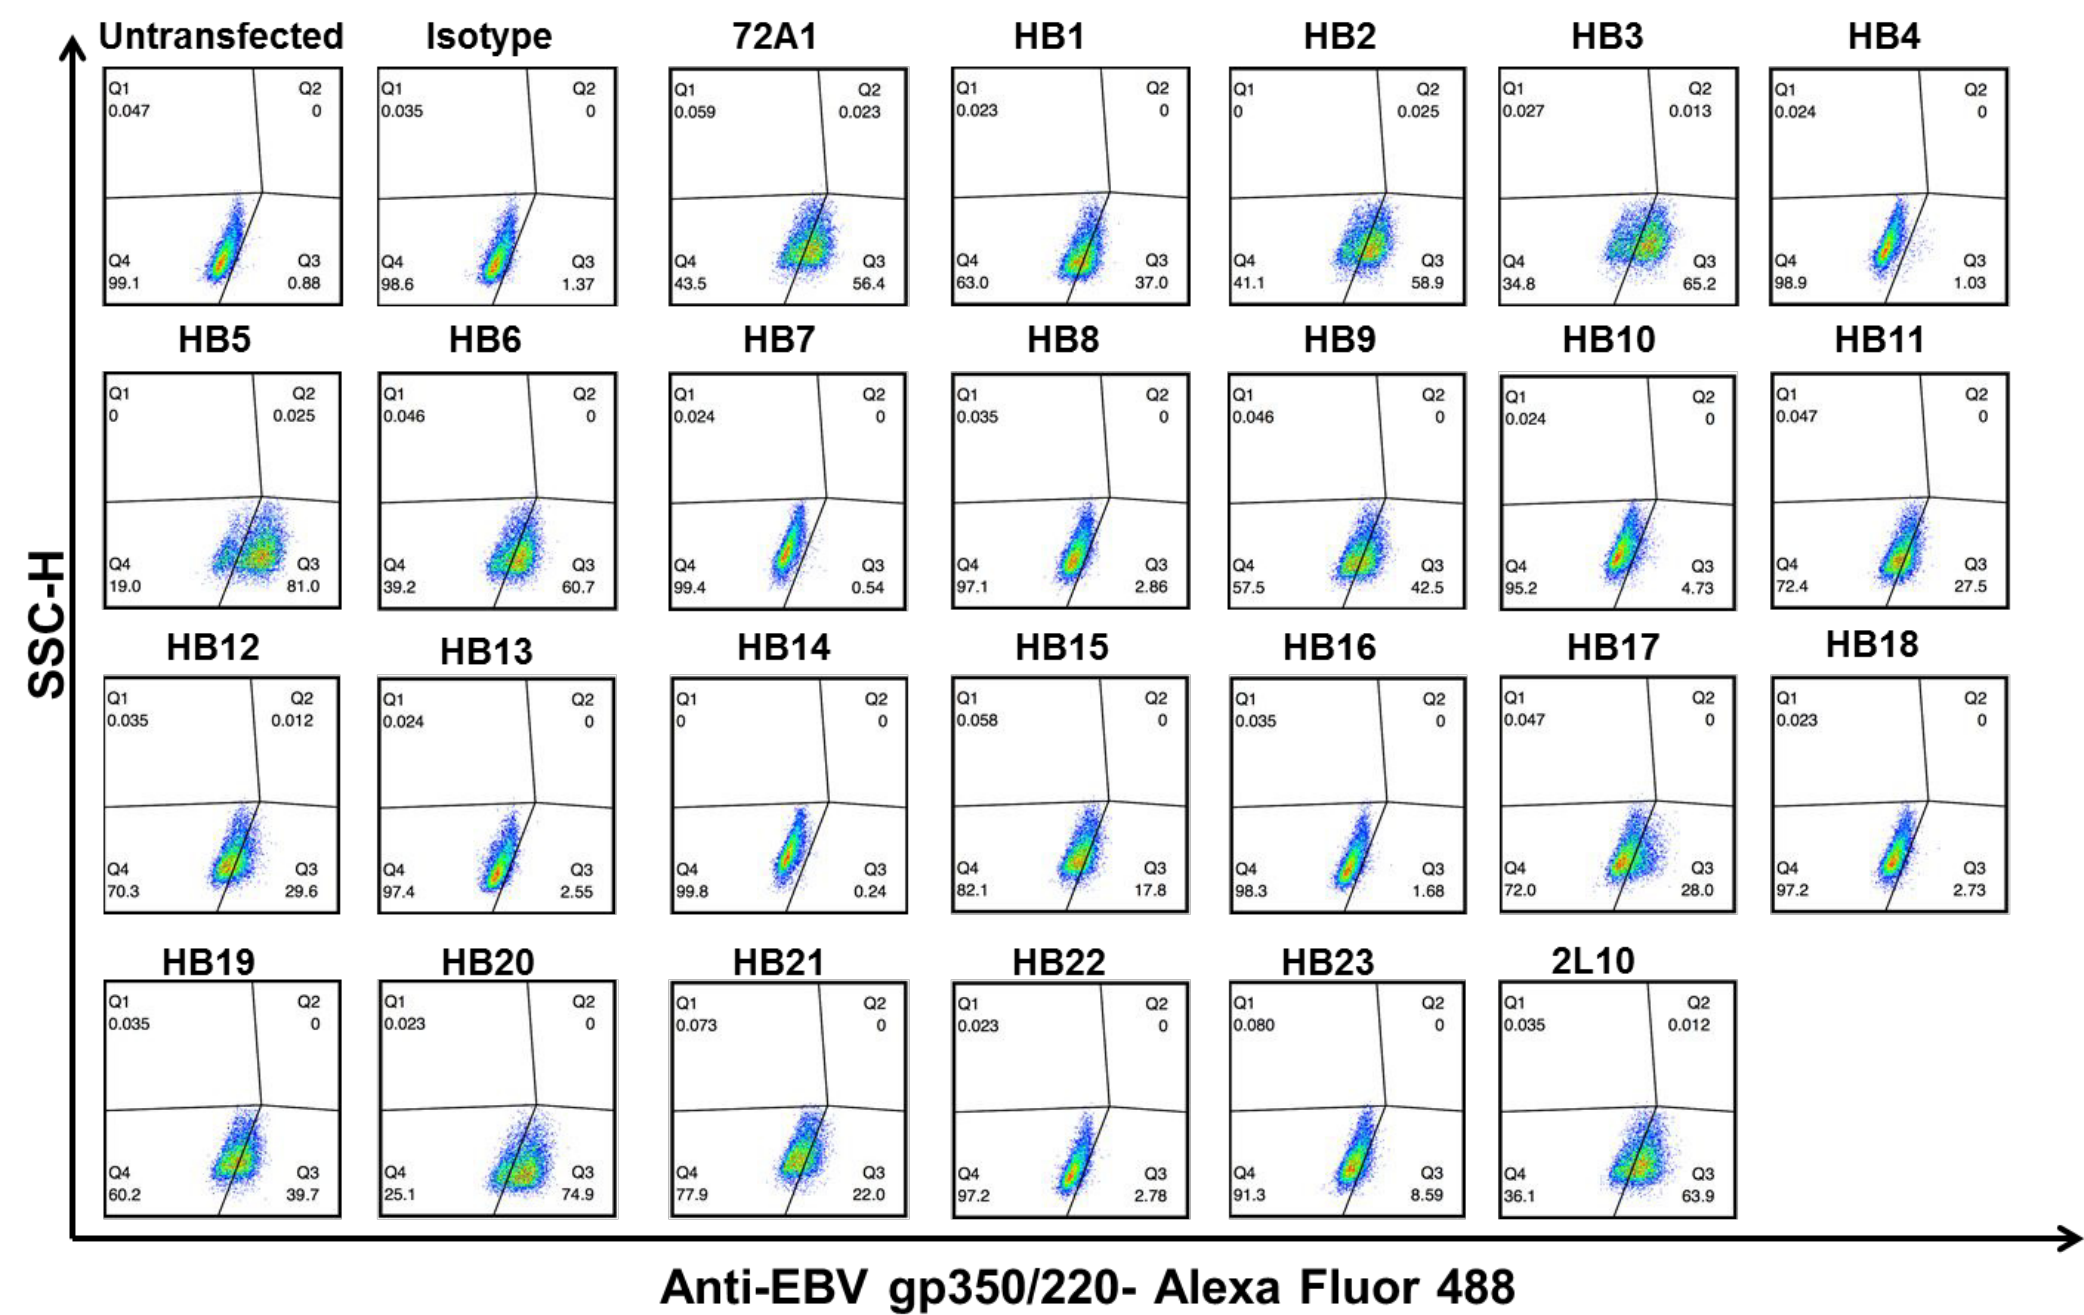



|                      |   | FR-1                        |          |                     |                  |                               | FR-2           |            |        |      |        | FR-3 |        |   |        |    |        |   |        |   |        |    |    |
|----------------------|---|-----------------------------|----------|---------------------|------------------|-------------------------------|----------------|------------|--------|------|--------|------|--------|---|--------|----|--------|---|--------|---|--------|----|----|
| Conservation:        |   | 95                          | 96       | 6                   | 69               | 6                             | 9              | 55         | 5      | 9565 | 75     | 757  | 5      | 9 | 5      | 95 | 7      | 6 | 7      | 7 | 6      | 66 | 77 |
| 72A1                 | 1 | --PELVKPGTSMKISCKAS         | GSSFTDY  | TMNWMKQSHGKNLEWIGL  | INPYNGG          | TRYNQKFKGKATLTL               | DKSSSTAYMEVLSL |            |        |      |        |      |        |   |        |    |        |   |        |   |        |    | 78 |
| HB1                  | 1 | --PGLVAPSQSL SITCTVS        | GFLTTY   | GVHWVRQPPGKGLEWLV   | IWAGG-S          | TNYNSALMSRLSINKDISKSQVFLKMNSL |                |            |        |      |        |      |        |   |        |    |        |   |        |   |        |    | 77 |
| HB2                  | 1 | --PELKKPGETVKISCKAS         | GYTFTAY  | SMHWVKLTPGKGLKWMGW  | INTKTGE          | PTYADDFKGRFAFSLETSASTAYLQINNL |                |            |        |      |        |      |        |   |        |    |        |   |        |   |        |    | 78 |
| HB3                  | 1 | --AELVRPGASVKLSCKAS         | GYTFASY  | WMQVVKQWPGQGLEWIGE  | INPNNGH          | TNYNERFKNKASLTVDKSSSTAYMQLSSL |                |            |        |      |        |      |        |   |        |    |        |   |        |   |        |    | 78 |
| HB5                  | 1 | --AELVRPGASVKISCKAF         | GYTFTNH  | NINWVKQRPQGGLDWIGY  | INPYNDY          | TSYNQKFKGKATLTVDKSSNTAYMELSSL |                |            |        |      |        |      |        |   |        |    |        |   |        |   |        |    | 78 |
| HB6                  | 1 | --PELRKPGETVKISCKAS         | GYTFTDY  | SMHWVKQTPGKGLKWMGW  | INTRTGE          | PRYADDFKGRFAFSLETSASTAYLQINNL |                |            |        |      |        |      |        |   |        |    |        |   |        |   |        |    | 78 |
| HB7                  | 1 | --AELVRPGASVKLSCKAL         | GYTFTDY  | EMHWVKQTPVHGLEWIGT  | ISPRSG           | TAYNQKFKGKATLTADKSSRTAYMELNSL |                |            |        |      |        |      |        |   |        |    |        |   |        |   |        |    | 78 |
| HB8                  | 1 | --PELKKPGETVKISCKAS         | GYSFTNY  | GMNVVKQAPGKGLKWMGW  | INTYTGE          | PTYADDFKGRFAFSLETSASTAFLQINNL |                |            |        |      |        |      |        |   |        |    |        |   |        |   |        |    | 78 |
| HB9                  | 1 | --GGLVKPGGSLKLSCAAS         | GFTFSSY  | TMSWVRQTPDKRLEWVAT  | ISSGGSY          | IYYPDSVKGRFTISRDNAKNTLYLQMSL  |                |            |        |      |        |      |        |   |        |    |        |   |        |   |        |    | 78 |
| HB10                 | 1 | --AELVRPGASVKLSCKAS         | GYTFTSY  | WMHWVKQWPGQGP EWIGE | INPSNGH          | TNYNERFKNKATLTVDKSSSTAYMQLSSL |                |            |        |      |        |      |        |   |        |    |        |   |        |   |        |    | 78 |
| HB11                 | 1 | --PSLVKPSQTLTSLTCSVT        | GDSITSG  | FWNWIRKFPGNKLEYMGY  | ISYSG-S          | TYYNPSLKSRSITRDTSKNQYYLQLNSV  |                |            |        |      |        |      |        |   |        |    |        |   |        |   |        |    | 77 |
| HB12                 | 1 | --AELVRPGASVKLSCKAS         | GYTFTNY  | WIHWVKQWPGQGLEWIGE  | INPNNGH          | TNYNERFKNKASLTVDKSSSTAYMQLSSL |                |            |        |      |        |      |        |   |        |    |        |   |        |   |        |    | 78 |
| HB14                 | 1 | SGAELVRPGASVNLCKAL          | GYTFTDY  | EMHWVKQTPVYGLEWIGT  | IHPRRG           | TAYNQRFKGAALADKSSSTAYMELSSL   |                |            |        |      |        |      |        |   |        |    |        |   |        |   |        |    | 80 |
| HB17                 | 1 | --AELVIPGASVKVSKAS          | GYTFTSY  | WIHWVKQWPGQGLEWIGE  | INPNNGH          | TNYNEKFKSKATLTVDKSSSTAYMQLSSL |                |            |        |      |        |      |        |   |        |    |        |   |        |   |        |    | 78 |
| HB20                 | 1 | --AELVKPGASVKLSCKAS         | GYTFTSY  | WIQWVKQRPQGQGLEWIGE | INPTNGH          | TNYNEKFKTKATLTVDKSSSTAYMRLSSL |                |            |        |      |        |      |        |   |        |    |        |   |        |   |        |    | 78 |
| HB22                 | 1 | --PGLVAPSQSL SITCTVS        | GFSLTNY  | GIHWVRQPPGKGLEWLVV  | IWSDG-S          | TIYNSALKSRLSISKDNSKSQVFLKMNSL |                |            |        |      |        |      |        |   |        |    |        |   |        |   |        |    | 77 |
| <u>Consensus_aa:</u> |   | . . s . LV . Pt . o l p l o | Cpho     | G@ohTsy . hp        | WV+Q . Psp . L-W | hGhIps . st . h . Yspph       | Kt+hslo . Dp   | Spsph@hphs | SL     |      |        |      |        |   |        |    |        |   |        |   |        |    |    |
| <u>Consensus_ss:</u> |   | ee                          | eeeeeeee |                     | eeeeee           |                               | eeeeee         |            | eeeeee |      | eeeeee |      | eeeeee |   | eeeeee |    | eeeeee |   | eeeeee |   | eeeeee |    |    |

CDR-1

CDR-2

|                      |    | FR-4                        |                 |                        |                        |        |        |     |       |       |      |          |       |   |   |       |   |   |    |    |  |     |
|----------------------|----|-----------------------------|-----------------|------------------------|------------------------|--------|--------|-----|-------|-------|------|----------|-------|---|---|-------|---|---|----|----|--|-----|
| Conservation:        |    | 79                          | 69              | 9                      | 55                     | 5      | 9565   | 75  | 757   | 5     | 9    | 5        | 95    | 7 | 6 | 7     | 7 | 6 | 66 | 77 |  |     |
| 72A1                 | 79 | TSEDSAVYYCAGGLRR-VN----     | WFAY            | WGQGLVSVSAAKTT         | PPSVYPLAPGSAAQTNSMVTLG |        |        |     |       |       |      |          |       |   |   |       |   |   |    |    |  | 137 |
| HB1                  | 78 | QTDDTAMYYCTRDRGY-GYLY--     | AMDY            | WGQGSVTVSSAKTT         | PPSVYPLAPGSAAQTNSMVTLG |        |        |     |       |       |      |          |       |   |   |       |   |   |    |    |  | 138 |
| HB2                  | 79 | KNEDTATYFCAPYGYA-----       | LDY             | WGQGSVTVSSAKTT         | PPSVYPLAPGSAAQTNSMVTLG |        |        |     |       |       |      |          |       |   |   |       |   |   |    |    |  | 134 |
| HB3                  | 79 | TSEDSAVYYCARNLYY-YGRP----   | DY              | WGQGSVTVSSAKTT         | APSVYPLAPVCGDTTGSSVTLG |        |        |     |       |       |      |          |       |   |   |       |   |   |    |    |  | 137 |
| HB5                  | 79 | TSEDSAVYYCARSEGW-LRRG-AWFAY | WGQGLVTVSAAKTT  | APSVYPLAPVCGDTTGSSVTLG |                        |        |        |     |       |       |      |          |       |   |   |       |   |   |    |    |  | 140 |
| HB6                  | 79 | KNEDTATYFCAPYGYA-----       | LDY             | WGQGSVTVSSAKTT         | PPSVYPLAPGSAAQTNSMVTLG |        |        |     |       |       |      |          |       |   |   |       |   |   |    |    |  | 134 |
| HB7                  | 79 | TSEDSAVYYCSR-----YGHP-SYLDV | WGAGTTVTVSSAKTT | PPSVYPLAPGSAAQTNSMVTLG |                        |        |        |     |       |       |      |          |       |   |   |       |   |   |    |    |  | 136 |
| HB8                  | 79 | KNEDTATYLCARYYYGSVYSA--     | WFAY            | WGQGLVTVSAAKTT         | PPSVYPLAPGSAAQTNSMVTLG |        |        |     |       |       |      |          |       |   |   |       |   |   |    |    |  | 140 |
| HB9                  | 79 | KSEDTAIYYCTREDFY-YGSSY      | GFFDV           | WGAGTTVTVSSAKTT        | APSVYPLAPVCGDTTGSSVTLG |        |        |     |       |       |      |          |       |   |   |       |   |   |    |    |  | 141 |
| HB10                 | 79 | TSEDSAVYYCARNLYY-YGRP----   | DY              | WGQGSVTVSSAKTT         | PPSVYPLAPGSAAQTNSMVTLG |        |        |     |       |       |      |          |       |   |   |       |   |   |    |    |  | 137 |
| HB11                 | 78 | TTEDTATYYCARGNGG-NYDW--     | YFDV            | WGAGTTVTVSSAKTT        | PPSVYPLAPGSAAQTNSMVTLG |        |        |     |       |       |      |          |       |   |   |       |   |   |    |    |  | 138 |
| HB12                 | 79 | TSEDSAVYYCARNLYY-YGRP----   | DY              | WGQGSVTVSS             | -----                  |        |        |     |       |       |      |          |       |   |   |       |   |   |    |    |  | 111 |
| HB14                 | 81 | TSEDSAVYYCAR-----YGY        | P-WYFDV         | WGAGTTVTVSS            | -----                  |        |        |     |       |       |      |          |       |   |   |       |   |   |    |    |  | 112 |
| HB17                 | 79 | TSEDSAVYYCARNLFY-YSRP----   | DY              | WGQGSVTVSSAKTT         | PPSVYPLAPVCGDTTGSSVTLG |        |        |     |       |       |      |          |       |   |   |       |   |   |    |    |  | 137 |
| HB20                 | 79 | TSEDSAVYYCARNLYY-YGRP----   | DY              | WGQGSVTVSSAKTT         | APSVYPLAPVCGDTTGSSVTLG |        |        |     |       |       |      |          |       |   |   |       |   |   |    |    |  | 137 |
| HB22                 | 78 | QTDDTAMYYCARNYYGNSYPA--     | WFAY            | WGQGLVTVSAAKTT         | PPSVYPLAPGSAAQTNSMVTLG |        |        |     |       |       |      |          |       |   |   |       |   |   |    |    |  | 139 |
| <u>Consensus_aa:</u> |    | po                          | ED              | AhYYC                  | TR                     | .....s | WG     | .GT | .VTVS | tAKTT | s    | PSVYPLAP | sttsp | T | S | .VTLG |   |   |    |    |  |     |
| <u>Consensus_ss:</u> |    | hhh                         | eeeeeee         |                        | e                      | eeeeee | eeeeee |     | eee   |       | eeee |          | eeee  |   |   |       |   |   |    |    |  |     |

CDR-3





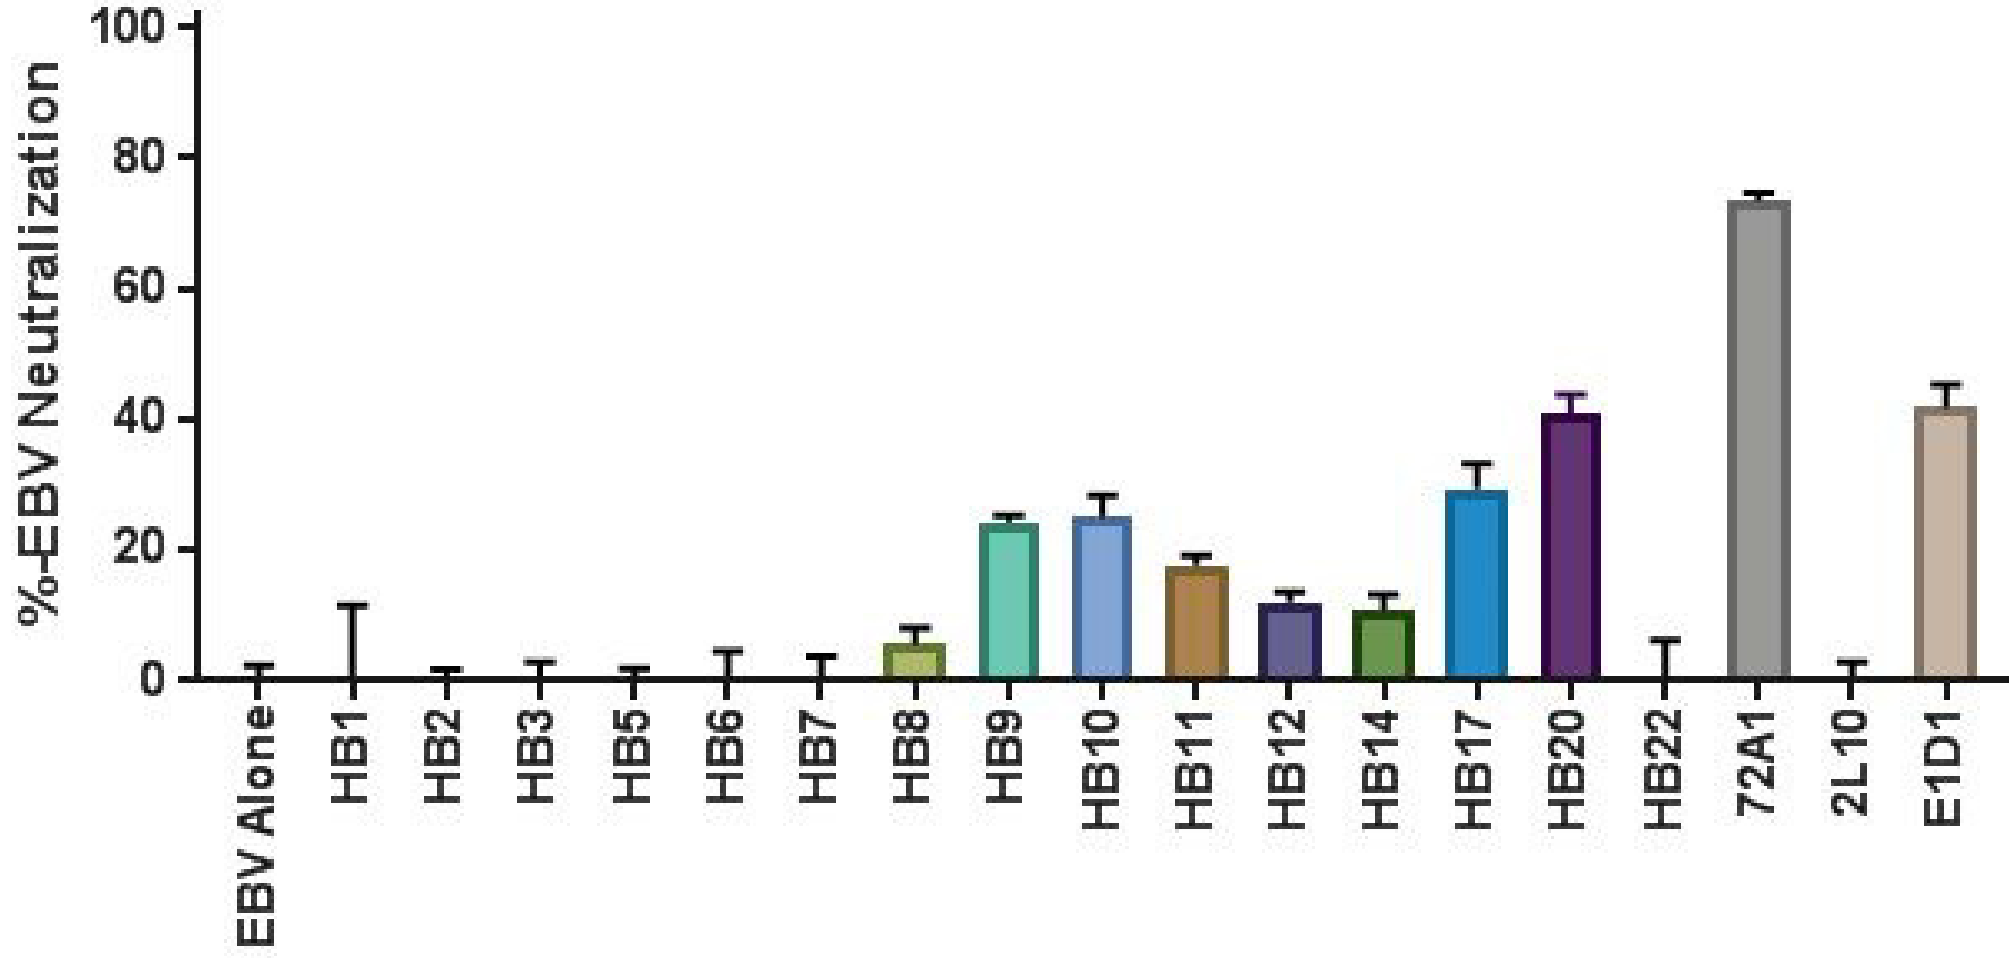

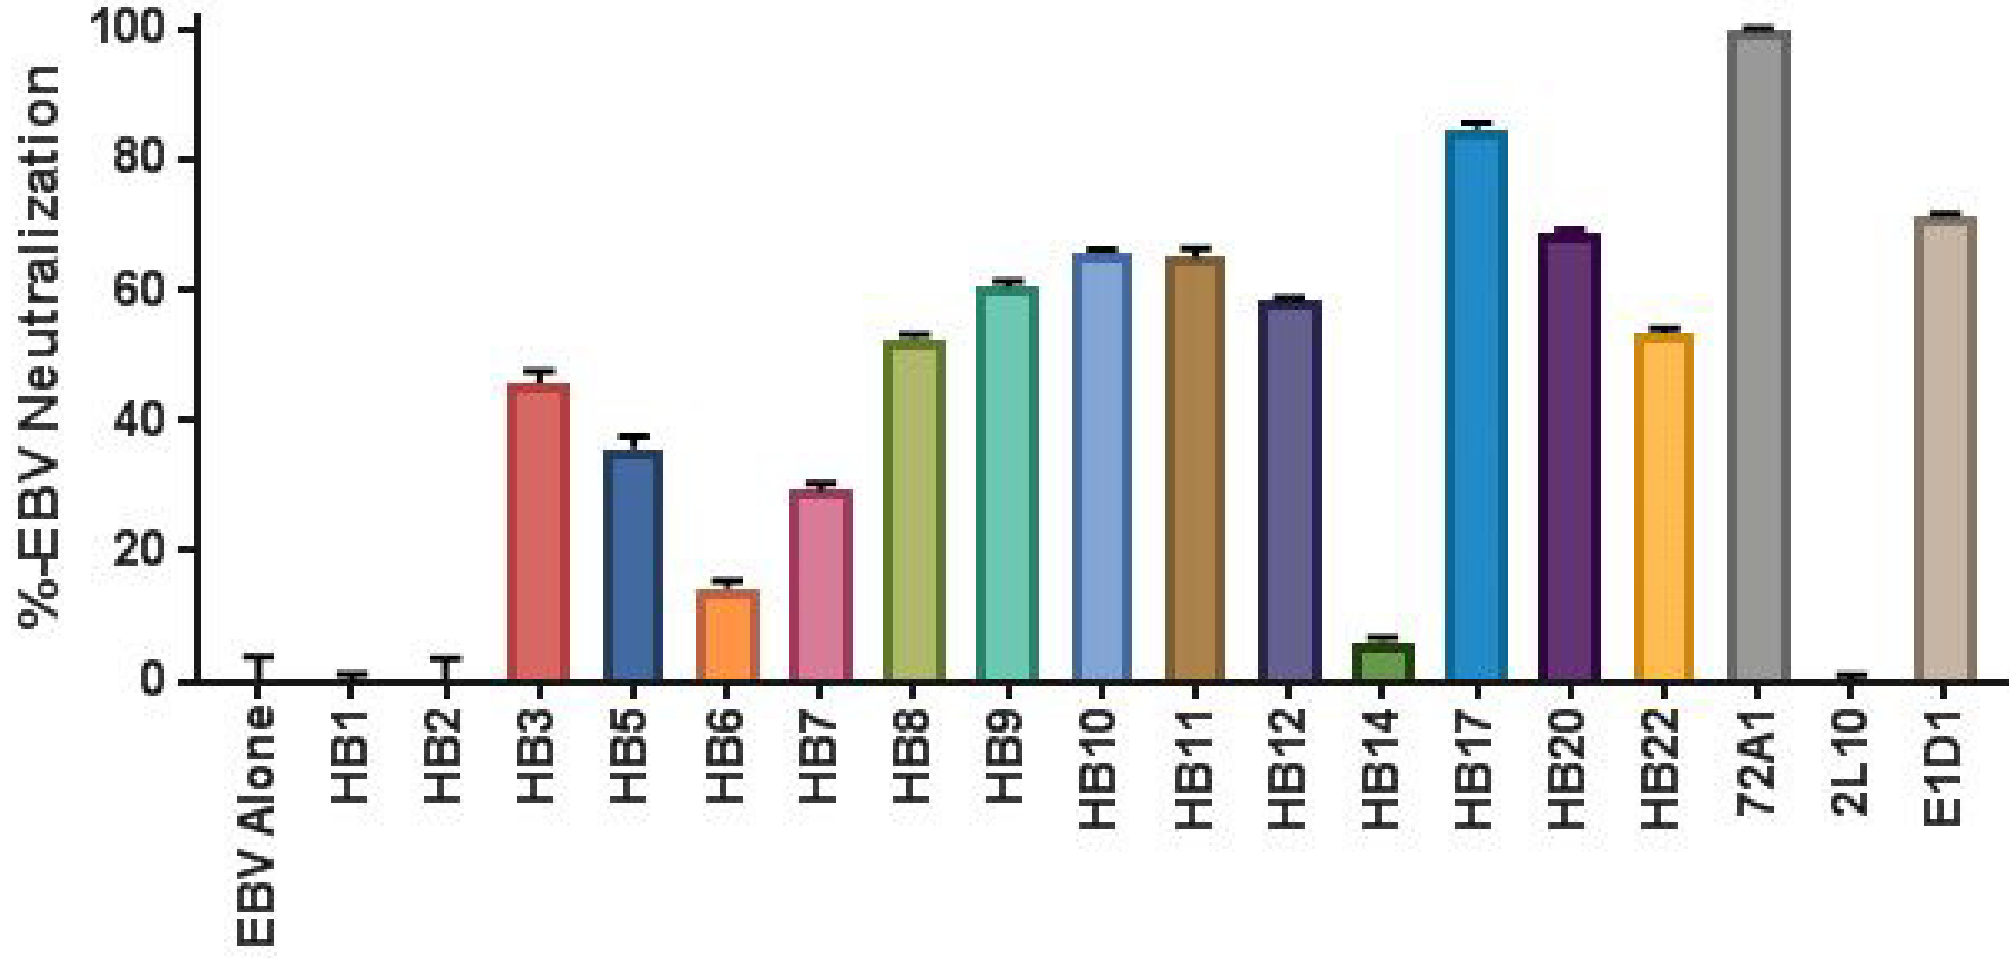

|     |            |            |            |             |            |             |
|-----|------------|------------|------------|-------------|------------|-------------|
| 1   | MEALLVCQY  | TIQSLIHLTG | EDPGFFNVEI | PEFPFYPTCN  | VCTADVNVTI | NFDVGGKKHQ  |
| 61  | LDLDFGQLTP | HTKAVYQPRG | AFGGSENATN | LFLLELLGAG  | ELALTMRSKK | LPINVTTGEE  |
| 121 | QQVSLESVDV | YFQDVFGTMW | CHHAEMQNPV | YLIPETVPYI  | KWDNCNSTNI | TAVVRAQGLD  |
| 181 | VTLPLSLPTS | AQDSNFSVKT | EMLGNEIDIE | CIMEDGEISQ  | VLPGDNKFNI | TCSGYESHVP  |
| 241 | SGGILTSTSP | VATPIPGTGY | AYSLRLTPRP | VSRLFNNNSI  | LYVFYSGNGP | KASGGDYCIQ  |
| 301 | SNIVFSDEIP | ASQDMPTNTT | DITYVGDNAT | YSVPMVTSSE  | ANSPNVTVTA | FWAWPNNTE   |
| 361 | DFKCKWTLTS | GTPSGCENIS | GAFASNRTFD | IT/VSGLGTAP | KTLIITRTAT | NATTTTHKVI  |
| 421 | FSKAPESTTT | SPTLNTTGFA | DPNTTTGLPS | STHVPTNLTA  | PASTGPTVST | ADVTSPTPAG  |
| 481 | TTSGASPVTP | SPSPWDNGTE | SKAPDMTSST | SPVTTPTPNA  | TSPTPAVTTP | TPNATSPTPA  |
| 541 | VTTPTPNATS | PTLGKTSPTS | AVTTPTPNAT | SPTLGKTSPT  | SAVTTPTPNA | TSPTLGKTSPT |
| 601 | TSAVTTPTPN | ATGPTVGETS | PQANATNHTL | GGTSPTPVVT  | SQPKNATSAV | TTGQHNITSS  |
| 661 | STSSMSLRPS | SNPETLSPST | SDNSTSHMPL | L TSAHPTGGE | NITQVTPASI | STHHVSTSSP  |
| 721 | APRPGTTSQA | SGPGNSSTST | KPGEVNVTKG | TPPQNATSPO  | APSGQKTAVP | TVTSTGGKAN  |
| 781 | STTGGKHTTG | HGARTSTEPT | TDYGGDSTTP | RPRYNATTYL  | PPSTSSKLRP | RWTFTSPPVT  |
| 841 | TAQATVPVPP | TSQPRFSNLS | MLVLQWASLA | VLTL LLLLV  | ADCAFRRNLS | TSHTYTPPY   |
| 901 | DDAETYV    |            |            |             |            |             |

|     |            |            |            |              |            |             |
|-----|------------|------------|------------|--------------|------------|-------------|
| 1   | MEALLVCQY  | TIQSLIHLTG | EDPGFFNVEI | PEFPFYPTCN   | VCTADVNTI  | NFDVGGKKHQ  |
| 61  | LDLDFGQLTP | HTKAVYQPRG | AFGGSENATN | LFLLELLGAG   | ELALTMRSKK | LPINVTGEE   |
| 121 | QQVSLESVDV | YFQDVFGTMW | CHHAEMQNPV | YLIPETVPYI   | KWDNCNSTNI | TAVVRAQGLD  |
| 181 | VTLPLSLPTS | AQDSNFSVKT | EMLGNEIDIE | CIMEDGEISQ   | VLPGDNKFNI | TCSGYESHVP  |
| 241 | SGGILTSTSP | VATPIPGTGY | AYSLRLTPRP | VSREFLGNSI   | LYVFYSGNGP | KASGGDYCIQ  |
| 301 | SNIVFSDEIP | ASQDMPTNTT | DITYVGDNAT | YSVPMVTSED   | ANSPNVTVTA | FWAWPNNTET  |
| 361 | DFKCKWTLTS | GTPSGCENIS | GAFASNRTFD | ITVSGLGTAP   | KTLIITRTAT | NATTTTHKVI  |
| 421 | FSKAPESTTT | SPTLNNTGFA | DPNTTTGLPS | STHVPTNLTA   | PASTGPTVST | ADVTSPTPAG  |
| 481 | TTSGASPVTP | SPSPWDNGTE | SKAPDMTSST | SPVTTPTPNA   | TSPTPAVTTP | TPNATSPTPA  |
| 541 | VTTPTPNATS | PTLGKTSPTS | AVTTPTPNAT | SPTLGKTSPT   | SAVTTPTPNA | TSPTLGKTSP  |
| 601 | TSAVTTPTPN | ATGPTVGETS | PQANATNHTL | GGTSPTPVVT   | SQPKNATSAV | TTGQHNTSS   |
| 661 | STSSMSLRPS | SNPETLSPST | SDNSTSHMPL | L TSAHPTGGE  | NITQVTPASI | STHHVSTSSP  |
| 721 | APRPGTTSQA | SGPGNSSTST | KPGEVNVTKG | TPPQNATSPO   | APSGQKTAVP | TVTSTGGKAN  |
| 781 | STTGKHTTG  | HGARTSTEPT | TDYGGDSTTP | RPRYNATTYL   | PPSTSSKLRP | RWTF TSPV T |
| 841 | TAQATVPVPP | TSQPRFSNLS | MLVLQWASLA | VLTL LLLLV M | ADCAFRRNLS | TSHTY TTPPY |
| 901 | DDAETYV    |            |            |              |            |             |
